# Supplementary material for: Revealing the truncated conical geometry of nanochannels in anodic aluminium oxide membranes
Source: Royal Society of Chemistry journal article supplement (doi:10.1039/d2nr01006b), 2022-01-01
Supplement: d2nr01006b1.pdf [file d2nr01006b1.pdf]

## Electronic Supplementary Information

### Revealing truncated conical geometry of nanochannels in anodic aluminium oxide membranes

Junxi Zhang,<sup>\*a</sup>, Huaping Zhao,<sup>b</sup> Ming Gong,<sup>c</sup> Lide Zhang,<sup>d</sup> Zhijun Yan,<sup>e</sup> Kang Xie,<sup>f</sup>  
Guangtao Fei,<sup>d</sup> Xiaoguang Zhu,<sup>d</sup> Mingguang Kong,<sup>d</sup> Shuyuan Zhang,<sup>g</sup> Lin Zhang<sup>h</sup>  
and Yong Lei,<sup>\*b</sup>

<sup>a</sup> School of Instrument Science and Opto-electronics Engineering, Anhui Key Laboratory of Advanced Functional Materials and Devices, and Anhui Province Key Laboratory of Measuring Theory and Precision Instrument, Hefei University of Technology, Hefei 230009, China.

<sup>b</sup> Institute of Physics & IMN MacroNanos, Ilmenau University of Technology, Ilmenau 98693, Germany.

<sup>c</sup> Laboratory of Engineering and Material Science, University of Science and Technology of China, Hefei 230027, China.

<sup>d</sup> Key Laboratory of Materials Physics, Institute of Solid State Physics, Chinese Academy of Sciences, Hefei 230031, China.

<sup>e</sup> School of Optical and Electronic Information, Huazhong University of Science and Technology, Wuhan 430074, China.

<sup>f</sup> School of Opto-Electronic Engineering, Zaozhuang University, Zaozhuang 277160, Shandong, China.

<sup>g</sup> Hefei National Laboratory for Physical Sciences at Microscale, University of Science and Technology of China, Hefei 230026, China.

<sup>h</sup> Aston Institute of Photonic Technologies, School of Engineering & Applied Science, Aston University, Birmingham B4 7ET, UK.

\*Email: junxi.zhang@hfut.edu.cn; yong.lei@tu-ilmenau.de

**1. Measurements of optical reflection spectra of the cross sections of AAO membranes.**

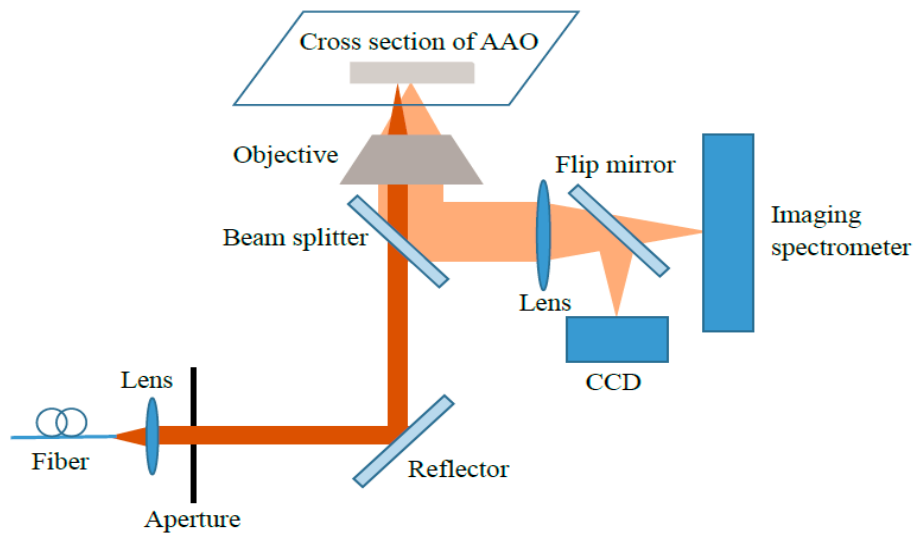

**Fig. S1.** Schematic illustration of micro-spectroscopy measurements of the cross sections of AAO membrane by a confocal microscope (Olympus, 100×) with an imaging spectrometer (iHR550).

## 2. Measurements of sizes and their distributions of the top and the bottom nanochannels of AAO membranes by a Gatan DigitalMicrograph (DM) software

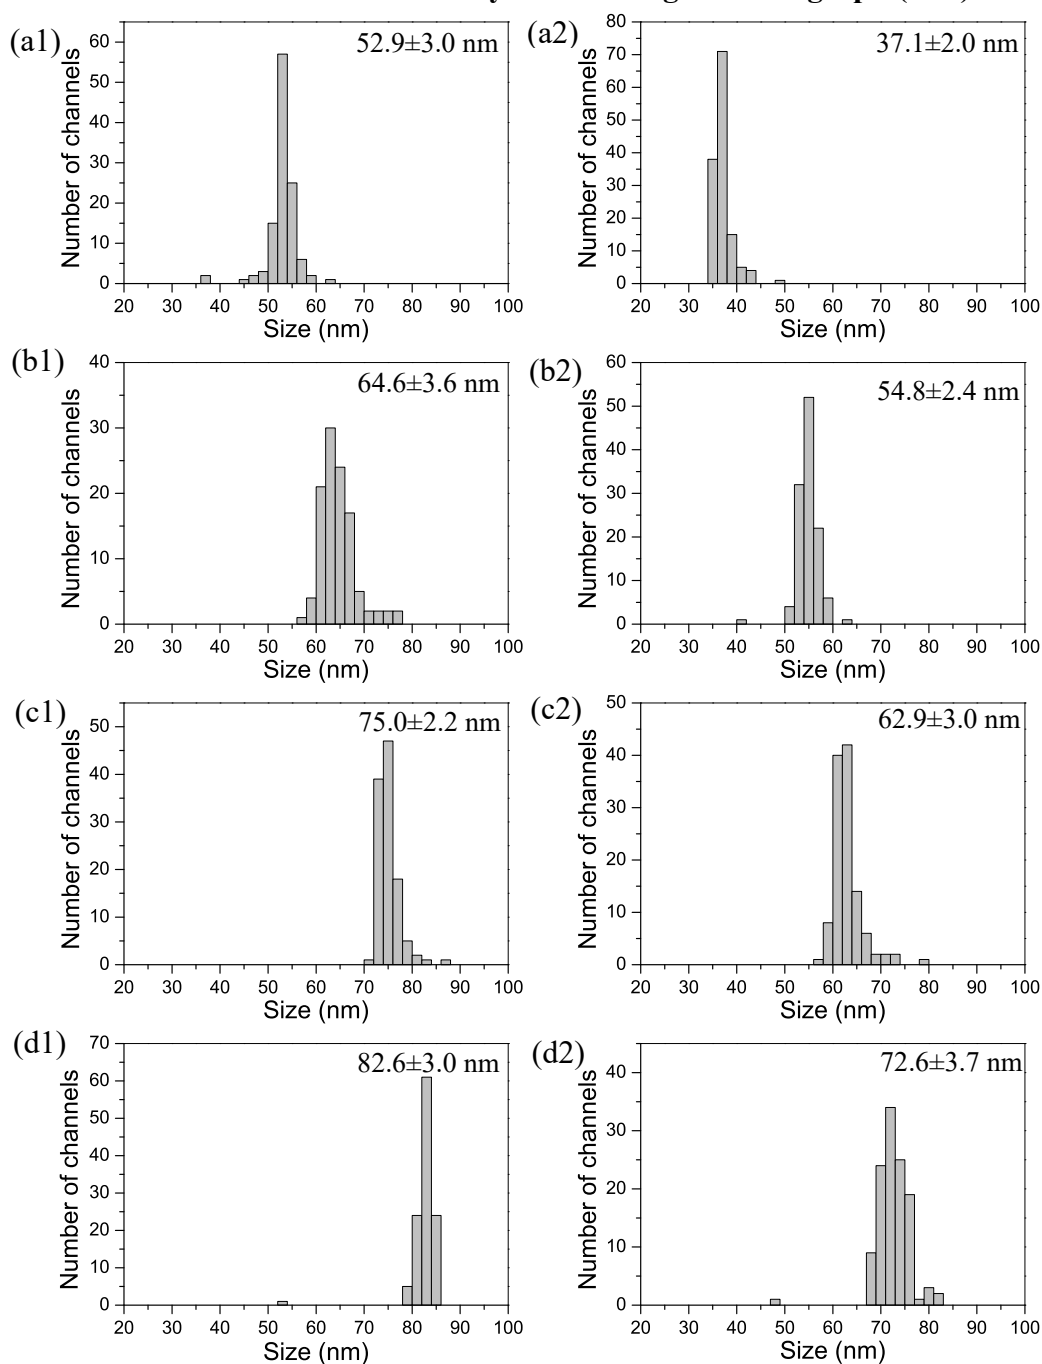

**Fig. S2.** Size distribution histograms of the top and the bottom nanochannels in the through-channel AAO membranes prepared at 13 °C for 640 min. (a1), (b1), (c1) and (d1) show the size distributions of the top nanochannels in the AAO membranes after the etching for 0, 10, 35, and 60 min, respectively. (a2), (b2), (c2) and (d2) represent those of the bottom nanochannels in the same AAO membranes corresponding to (a1), (b1), (c1) and (d1), respectively.

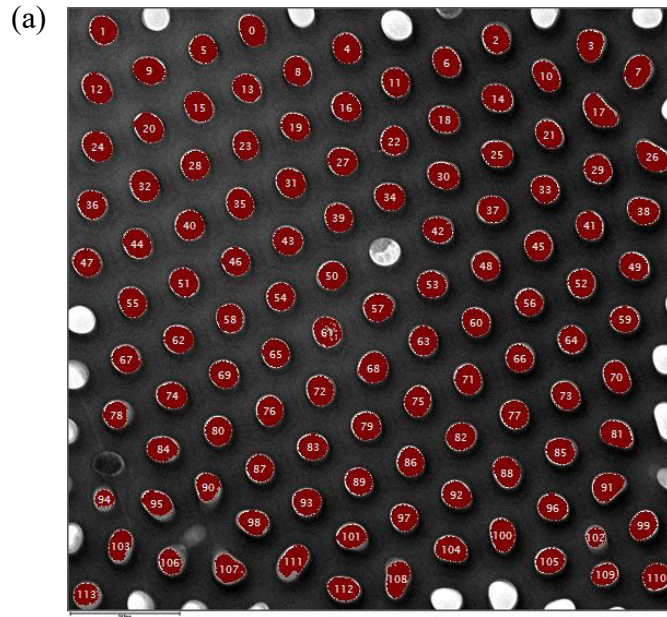

(b)

|     | FilledArea | CircDiamete |
|-----|------------|-------------|
| R0  | 2280.0     | 54.5703     |
| R1  | 2202.0     | 52.8572     |
| R2  | 2134.0     | 52.2179     |
| R3  | 2312.0     | 54.6199     |
| R4  | 2327.0     | 54.3323     |
| R5  | 2203.0     | 52.7833     |
| R6  | 2254.0     | 53.7435     |
| R7  | 2377.0     | 56.3166     |
| R8  | 2227.0     | 53.2053     |
| R9  | 2422.0     | 55.6042     |
| R10 | 2239.0     | 54.257      |
| R11 | 2172.0     | 52.5        |
| R12 | 2413.0     | 55.8402     |
| R13 | 2185.0     | 52.8192     |
| R14 | 2325.0     | 54.6116     |
| R15 | 2379.0     | 55.3362     |
| R16 | 2267.0     | 53.5268     |
| R17 | 2678.0     | 62.209      |
| R18 | 2211.0     | 53.1303     |
| R19 | 2145.0     | 52.0844     |
| R20 | 2380.0     | 55.1158     |
| R21 | 2090.0     | 51.7755     |
| R22 | 2139.0     | 52.0692     |
| R23 | 2057.0     | 51.0926     |
| R24 | 2479.0     | 56.1755     |
| R25 | 2229.0     | 53.4065     |
| R26 | 2560.0     | 59.2971     |
| R27 | 2233.0     | 53.088      |
| R28 | 2332.0     | 54.1737     |
| R29 | 2207.0     | 52.876      |
| R30 | 2282.0     | 54.0926     |
| R31 | 2380.0     | 54.8145     |
| R32 | 2470.0     | 56.2757     |
| R33 | 2101.0     | 51.4682     |
| R34 | 2238.0     | 53.2642     |
| R35 | 2310.0     | 54.26       |
| R36 | 2284.0     | 53.7183     |
| R37 | 2238.0     | 53.3121     |

|     | FilledArea | CircDiamete |
|-----|------------|-------------|
| R38 | 2356.0     | 55.0827     |
| R39 | 2216.0     | 52.8828     |
| R40 | 2397.0     | 54.9763     |
| R41 | 2118.0     | 51.6865     |
| R42 | 2157.0     | 52.5234     |
| R43 | 2336.0     | 54.3882     |
| R44 | 2284.0     | 54.0327     |
| R45 | 2237.0     | 53.159      |
| R46 | 2180.0     | 52.4772     |
| R47 | 2137.0     | 52.0755     |
| R48 | 2157.0     | 52.5649     |
| R49 | 2191.0     | 52.7649     |
| R50 | 2223.0     | 53.0789     |
| R51 | 2323.0     | 54.2185     |
| R52 | 2135.0     | 51.9912     |
| R53 | 2185.0     | 52.6043     |
| R54 | 2167.0     | 52.3258     |
| R55 | 2302.0     | 54.2594     |
| R56 | 2040.0     | 50.6056     |
| R57 | 2276.0     | 53.64       |
| R58 | 2184.0     | 52.6598     |
| R59 | 2053.0     | 50.9348     |
| R60 | 2189.0     | 52.5032     |
| R61 | 2347.0     | 54.5372     |
| R62 | 2236.0     | 53.1033     |
| R63 | 2279.0     | 53.6277     |
| R64 | 2064.0     | 50.9652     |
| R65 | 2160.0     | 52.1235     |
| R66 | 2125.0     | 51.7783     |
| R67 | 2179.0     | 52.5587     |
| R68 | 2492.0     | 56.3321     |
| R69 | 2210.0     | 52.7655     |
| R70 | 2320.0     | 54.9786     |
| R71 | 2237.0     | 53.3981     |
| R72 | 2238.0     | 53.314      |
| R73 | 2183.0     | 52.7069     |
| R74 | 2192.0     | 52.7517     |
| R75 | 2218.0     | 53.1606     |

|      | FilledArea | CircDiamete |
|------|------------|-------------|
| R76  | 2219.0     | 53.1239     |
| R77  | 2225.0     | 53.0537     |
| R78  | 1841.0     | 48.8374     |
| R79  | 2275.0     | 53.5428     |
| R80  | 2179.0     | 52.4814     |
| R81  | 2344.0     | 55.6951     |
| R82  | 2249.0     | 53.3933     |
| R83  | 2189.0     | 52.6894     |
| R84  | 2132.0     | 52.5734     |
| R85  | 2181.0     | 52.6339     |
| R86  | 2172.0     | 52.3992     |
| R87  | 2081.0     | 51.2947     |
| R88  | 2258.0     | 53.8119     |
| R89  | 2084.0     | 51.2297     |
| R90  | 1882.0     | 49.6917     |
| R91  | 2400.0     | 56.842      |
| R92  | 2179.0     | 52.6142     |
| R93  | 2167.0     | 52.3374     |
| R94  | 1047.0     | 37.6003     |
| R95  | 2022.0     | 52.3591     |
| R96  | 2200.0     | 52.8532     |
| R97  | 1990.0     | 49.9813     |
| R98  | 2104.0     | 52.5097     |
| R99  | 2157.0     | 52.417      |
| R100 | 2266.0     | 54.6898     |
| R101 | 1994.0     | 50.6999     |
| R102 | 1091.0     | 37.665      |
| R103 | 1944.0     | 51.8077     |
| R104 | 2281.0     | 54.6635     |
| R105 | 2111.0     | 51.8812     |
| R106 | 1650.0     | 46.2372     |
| R107 | 2308.0     | 55.9856     |
| R108 | 2360.0     | 58.2672     |
| R109 | 1612.0     | 45.4601     |
| R110 | 2068.0     | 51.122      |
| R111 | 2371.0     | 57.8847     |
| R112 | 2144.0     | 52.9468     |
| R113 | 1626.0     | 47.0765     |

**Fig. S2-a1.** (a) TEM image of the top surface of the AAO membrane without the chemical etching corresponding the analyzed nanochannels after the thresholding based on the DM software, the thresholding is the process of separating the top surfaces of the nanochannels from the rest of the image. (b) Measurements of the sizes (diameter, unit: nm) of the analyzed nanochannels on the top surface of the AAO membrane.

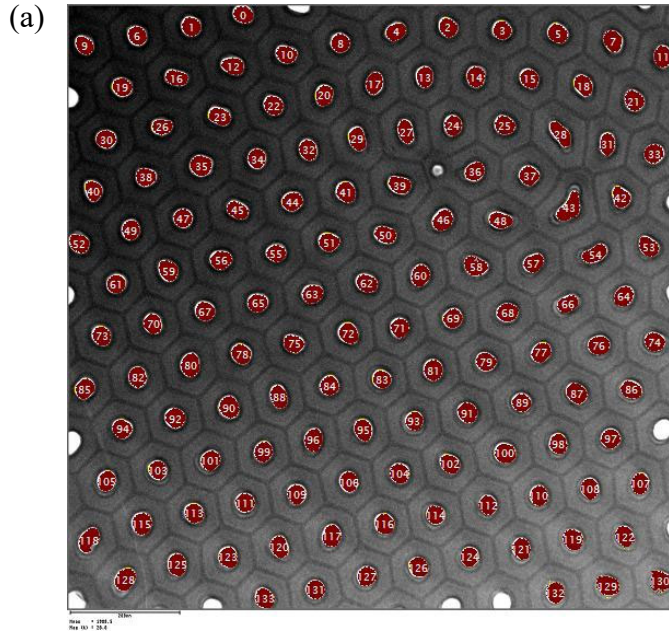

(b)

|     | FilledArea | CircDiamete |
|-----|------------|-------------|
| R0  | 969.0      | 35.1442     |
| R1  | 1028.0     | 35.8529     |
| R2  | 973.0      | 35.2076     |
| R3  | 966.0      | 34.8069     |
| R4  | 969.0      | 35.357      |
| R5  | 1071.0     | 36.8437     |
| R6  | 999.0      | 35.5366     |
| R7  | 1104.0     | 37.6434     |
| R8  | 997.0      | 35.3292     |
| R9  | 901.0      | 34.0675     |
| R10 | 1019.0     | 36.3045     |
| R11 | 1059.0     | 36.9223     |
| R12 | 1073.0     | 37.5598     |
| R13 | 995.0      | 35.6727     |
| R14 | 1050.0     | 36.5989     |
| R15 | 1002.0     | 35.6701     |
| R16 | 973.0      | 36.189      |
| R17 | 1029.0     | 36.5219     |
| R18 | 1055.0     | 37.1527     |
| R19 | 1008.0     | 35.6667     |
| R20 | 996.0      | 35.6642     |
| R21 | 1100.0     | 37.44       |
| R22 | 1022.0     | 35.803      |
| R23 | 1087.0     | 37.8755     |
| R24 | 975.0      | 35.1048     |
| R25 | 1049.0     | 36.4966     |
| R26 | 899.0      | 34.466      |
| R27 | 1051.0     | 38.0627     |
| R28 | 1161.0     | 42.4691     |
| R29 | 1116.0     | 38.865      |
| R30 | 1008.0     | 35.6095     |
| R31 | 965.0      | 35.9241     |
| R32 | 1035.0     | 36.2293     |
| R33 | 1047.0     | 36.2545     |
| R34 | 990.0      | 35.2827     |
| R35 | 1268.0     | 40.1151     |
| R36 | 1016.0     | 35.9082     |
| R37 | 1064.0     | 36.7211     |
| R38 | 1013.0     | 35.8891     |
| R39 | 1092.0     | 38.0244     |
| R40 | 983.0      | 35.7382     |
| R41 | 1111.0     | 37.4741     |
| R42 | 1051.0     | 37.2357     |
| R43 | 1507.0     | 49.4749     |
| R44 | 1081.0     | 36.8168     |

|     | FilledArea | CircDiamete |
|-----|------------|-------------|
| R45 | 1023.0     | 36.6071     |
| R46 | 1184.0     | 38.9227     |
| R47 | 987.0      | 35.1543     |
| R48 | 1073.0     | 37.9379     |
| R49 | 981.0      | 35.265      |
| R50 | 1039.0     | 36.7843     |
| R51 | 1051.0     | 36.5621     |
| R52 | 1034.0     | 36.4569     |
| R53 | 1056.0     | 37.1339     |
| R54 | 1143.0     | 40.7469     |
| R55 | 919.0      | 34.0752     |
| R56 | 1098.0     | 37.424      |
| R57 | 1022.0     | 36.338      |
| R58 | 1236.0     | 40.4201     |
| R59 | 1090.0     | 37.4675     |
| R60 | 1112.0     | 37.6477     |
| R61 | 986.0      | 35.2608     |
| R62 | 1068.0     | 36.9094     |
| R63 | 1054.0     | 36.4824     |
| R64 | 1061.0     | 36.7523     |
| R65 | 1019.0     | 35.9233     |
| R66 | 980.0      | 36.1629     |
| R67 | 1047.0     | 36.3408     |
| R68 | 1117.0     | 37.6377     |
| R69 | 1039.0     | 36.2255     |
| R70 | 1014.0     | 35.7761     |
| R71 | 987.0      | 35.1349     |
| R72 | 1142.0     | 37.9424     |
| R73 | 1017.0     | 35.7787     |
| R74 | 1069.0     | 36.7916     |
| R75 | 1010.0     | 35.9045     |
| R76 | 1141.0     | 38.0043     |
| R77 | 1073.0     | 36.8321     |
| R78 | 1101.0     | 37.328      |
| R79 | 1053.0     | 36.4441     |
| R80 | 1228.0     | 39.761      |
| R81 | 1116.0     | 37.4504     |
| R82 | 1038.0     | 36.2519     |
| R83 | 951.0      | 34.493      |
| R84 | 1038.0     | 36.098      |
| R85 | 1086.0     | 37.0931     |
| R86 | 1077.0     | 37.1516     |
| R87 | 1171.0     | 38.767      |
| R88 | 1072.0     | 37.7382     |
| R89 | 992.0      | 35.2596     |

|      | FilledArea | CircDiamete |
|------|------------|-------------|
| R90  | 1237.0     | 39.7094     |
| R91  | 1109.0     | 37.2961     |
| R92  | 1102.0     | 37.1813     |
| R93  | 938.0      | 34.1619     |
| R94  | 1050.0     | 36.4048     |
| R95  | 1091.0     | 37.388      |
| R96  | 1119.0     | 38.0326     |
| R97  | 1052.0     | 36.3877     |
| R98  | 1024.0     | 36.1348     |
| R99  | 1037.0     | 36.15       |
| R100 | 1206.0     | 38.9986     |
| R101 | 1068.0     | 36.7029     |
| R102 | 1047.0     | 36.6739     |
| R103 | 976.0      | 34.9363     |
| R104 | 1112.0     | 37.4179     |
| R105 | 1037.0     | 36.1443     |
| R106 | 1054.0     | 36.5915     |
| R107 | 1059.0     | 36.9477     |
| R108 | 1038.0     | 36.4689     |
| R109 | 1057.0     | 36.4231     |
| R110 | 1037.0     | 36.1691     |
| R111 | 1038.0     | 36.0716     |
| R112 | 968.0      | 35.0199     |
| R113 | 1066.0     | 36.6012     |
| R114 | 976.0      | 35.1715     |
| R115 | 1223.0     | 39.36       |
| R116 | 1132.0     | 37.7858     |
| R117 | 1143.0     | 38.086      |
| R118 | 1260.0     | 42.0887     |
| R119 | 1197.0     | 39.1042     |
| R120 | 1113.0     | 37.9974     |
| R121 | 1085.0     | 37.2107     |
| R122 | 1101.0     | 40.0643     |
| R123 | 1104.0     | 37.3577     |
| R124 | 1007.0     | 35.6787     |
| R125 | 1138.0     | 38.2325     |
| R126 | 1075.0     | 36.9632     |
| R127 | 1057.0     | 36.5514     |
| R128 | 1292.0     | 41.1262     |
| R129 | 1358.0     | 43.9933     |
| R130 | 1302.0     | 42.7455     |
| R131 | 1004.0     | 35.6434     |
| R132 | 1152.0     | 39.9754     |
| R133 | 1083.0     | 37.1432     |

**Fig. S2-a2.** (a) TEM image of the bottom surface of the AAO membrane without the chemical etching corresponding the analyzed nanochannels after the thresholding. (b) Measurements of the sizes (diameter, unit: nm) of the analyzed nanochannels on the bottom surface of the AAO membrane.

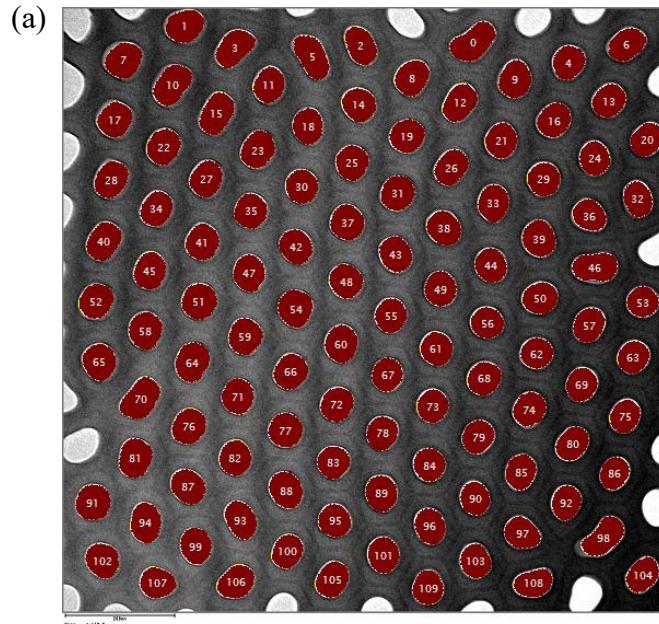

(b)

|     | FilledArea | CircDiamete |
|-----|------------|-------------|
| R0  | 4167.0     | 77.6757     |
| R1  | 3498.0     | 67.4905     |
| R2  | 3268.0     | 66.457      |
| R3  | 3630.0     | 71.5134     |
| R4  | 3028.0     | 62.229      |
| R5  | 3881.0     | 75.6831     |
| R6  | 3218.0     | 65.6902     |
| R7  | 3600.0     | 68.6301     |
| R8  | 3345.0     | 66.147      |
| R9  | 3381.0     | 66.1198     |
| R10 | 3911.0     | 73.4747     |
| R11 | 3087.0     | 63.1614     |
| R12 | 3445.0     | 67.6725     |
| R13 | 3071.0     | 62.6109     |
| R14 | 3193.0     | 63.9643     |
| R15 | 3749.0     | 71.588      |
| R16 | 3121.0     | 63.217      |
| R17 | 3365.0     | 66.195      |
| R18 | 3031.0     | 63.0992     |
| R19 | 3211.0     | 64.1397     |
| R20 | 2925.0     | 61.1658     |
| R21 | 3121.0     | 63.076      |
| R22 | 3294.0     | 65.2193     |
| R23 | 3435.0     | 66.6708     |
| R24 | 2877.0     | 60.49       |
| R25 | 3125.0     | 63.3171     |
| R26 | 3190.0     | 64.4361     |
| R27 | 3235.0     | 64.7648     |
| R28 | 3402.0     | 67.0302     |
| R29 | 3052.0     | 62.223      |
| R30 | 3062.0     | 62.6399     |
| R31 | 3259.0     | 64.5252     |
| R32 | 2834.0     | 60.7193     |
| R33 | 3150.0     | 63.8152     |
| R34 | 3129.0     | 63.809      |
| R35 | 3160.0     | 63.9215     |
| R36 | 2927.0     | 61.442      |

|     | FilledArea | CircDiamete |
|-----|------------|-------------|
| R37 | 3308.0     | 64.9664     |
| R38 | 3244.0     | 64.3283     |
| R39 | 3360.0     | 65.6243     |
| R40 | 3521.0     | 68.4586     |
| R41 | 3376.0     | 66.0066     |
| R42 | 3184.0     | 63.8943     |
| R43 | 3242.0     | 64.4        |
| R44 | 3067.0     | 62.3407     |
| R45 | 3332.0     | 65.7603     |
| R46 | 3731.0     | 72.1334     |
| R47 | 3271.0     | 65.3114     |
| R48 | 3173.0     | 63.5631     |
| R49 | 3104.0     | 62.7311     |
| R50 | 3152.0     | 63.3401     |
| R51 | 3479.0     | 66.4856     |
| R52 | 3266.0     | 65.0981     |
| R53 | 2706.0     | 58.4801     |
| R54 | 3567.0     | 67.607      |
| R55 | 3023.0     | 62.1885     |
| R56 | 2902.0     | 60.5846     |
| R57 | 2993.0     | 61.8261     |
| R58 | 3442.0     | 66.7767     |
| R59 | 3375.0     | 66.3239     |
| R60 | 3415.0     | 66.0713     |
| R61 | 3029.0     | 61.9671     |
| R62 | 2808.0     | 59.5754     |
| R63 | 2883.0     | 60.4642     |
| R64 | 3673.0     | 69.6643     |
| R65 | 3373.0     | 65.8686     |
| R66 | 3359.0     | 65.6857     |
| R67 | 2856.0     | 60.241      |
| R68 | 3082.0     | 62.5579     |
| R69 | 2913.0     | 60.9172     |
| R70 | 4087.0     | 76.1574     |
| R71 | 3191.0     | 64.1867     |
| R72 | 3129.0     | 63.1673     |
| R73 | 2925.0     | 60.8457     |

|      | FilledArea | CircDiamete |
|------|------------|-------------|
| R74  | 3102.0     | 63.2596     |
| R75  | 2781.0     | 59.6734     |
| R76  | 3347.0     | 65.8187     |
| R77  | 3285.0     | 64.8512     |
| R78  | 2983.0     | 61.7607     |
| R79  | 2984.0     | 61.6382     |
| R80  | 3005.0     | 62.3286     |
| R81  | 3631.0     | 69.1948     |
| R82  | 3154.0     | 63.618      |
| R83  | 2962.0     | 61.2668     |
| R84  | 2923.0     | 60.7592     |
| R85  | 2987.0     | 61.9611     |
| R86  | 2619.0     | 57.9694     |
| R87  | 3310.0     | 65.2305     |
| R88  | 3394.0     | 66.1628     |
| R89  | 3196.0     | 64.0321     |
| R90  | 2775.0     | 59.4063     |
| R91  | 3518.0     | 67.0897     |
| R92  | 2820.0     | 60.1941     |
| R93  | 3267.0     | 65.9851     |
| R94  | 3489.0     | 68.1474     |
| R95  | 3008.0     | 61.7714     |
| R96  | 3032.0     | 62.4314     |
| R97  | 3087.0     | 63.647      |
| R98  | 3836.0     | 75.2311     |
| R99  | 3167.0     | 63.9809     |
| R100 | 2916.0     | 61.401      |
| R101 | 3153.0     | 63.3854     |
| R102 | 3294.0     | 65.3829     |
| R103 | 2920.0     | 61.1132     |
| R104 | 3029.0     | 63.2184     |
| R105 | 3247.0     | 64.6985     |
| R106 | 3359.0     | 66.5047     |
| R107 | 3085.0     | 63.2313     |
| R108 | 3053.0     | 64.3793     |
| R109 | 2924.0     | 61.0265     |

**Fig. S2-b1.** (a) TEM image of the top surface of the AAO membrane with the chemical etching for 10 min corresponding the analyzed nanochannels after the thresholding. (b) Measurements of the sizes (diameter, unit: nm) of the analyzed nanochannels on the top surface of the AAO membranes.

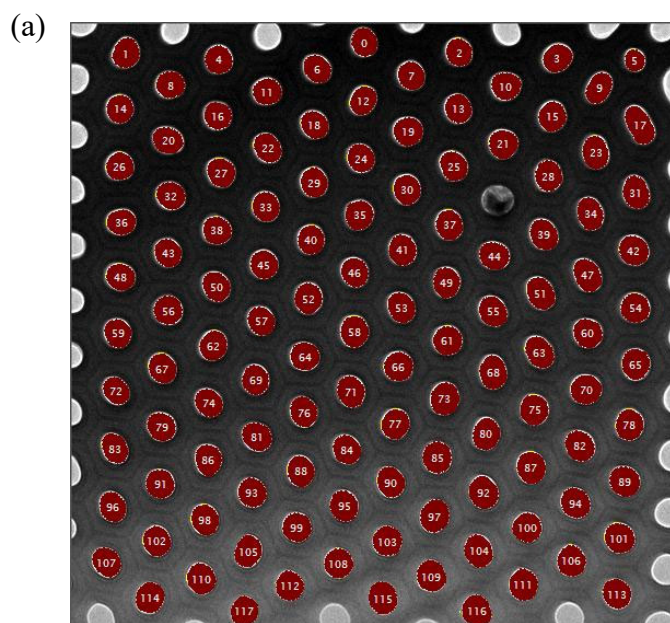

(b)

|     | FilledArea | CircDiamete |
|-----|------------|-------------|
| R0  | 2079.0     | 51.2939     |
| R1  | 2313.0     | 54.3009     |
| R2  | 2103.0     | 51.579      |
| R3  | 2345.0     | 54.5909     |
| R4  | 2201.0     | 52.6374     |
| R5  | 1310.0     | 40.6007     |
| R6  | 2126.0     | 52.0292     |
| R7  | 2181.0     | 52.6036     |
| R8  | 2174.0     | 52.4641     |
| R9  | 2192.0     | 53.7233     |
| R10 | 2340.0     | 54.5578     |
| R11 | 2178.0     | 52.5422     |
| R12 | 2162.0     | 52.4098     |
| R13 | 2207.0     | 52.9048     |
| R14 | 2162.0     | 52.15       |
| R15 | 2328.0     | 54.2432     |
| R16 | 2151.0     | 52.2516     |
| R17 | 2843.0     | 63.2774     |
| R18 | 2162.0     | 52.3407     |
| R19 | 2368.0     | 54.6665     |
| R20 | 2251.0     | 53.7247     |
| R21 | 2379.0     | 54.877      |
| R22 | 2262.0     | 53.8521     |
| R23 | 2463.0     | 56.3214     |
| R24 | 2164.0     | 52.265      |
| R25 | 2322.0     | 54.4543     |
| R26 | 2215.0     | 52.8736     |
| R27 | 2294.0     | 53.9513     |
| R28 | 2371.0     | 54.8696     |
| R29 | 2264.0     | 53.6002     |
| R30 | 2329.0     | 54.3841     |
| R31 | 2431.0     | 56.0737     |
| R32 | 2259.0     | 53.381      |
| R33 | 2282.0     | 53.6814     |
| R34 | 2383.0     | 55.6423     |
| R35 | 2335.0     | 54.3869     |
| R36 | 2119.0     | 51.8547     |
| R37 | 2308.0     | 54.0974     |
| R38 | 2266.0     | 53.5994     |
| R39 | 2417.0     | 55.5691     |

|     | FilledArea | CircDiamete |
|-----|------------|-------------|
| R40 | 2199.0     | 52.6575     |
| R41 | 2405.0     | 55.2177     |
| R42 | 2481.0     | 56.0682     |
| R43 | 2162.0     | 52.2697     |
| R44 | 2335.0     | 54.3686     |
| R45 | 2244.0     | 53.2282     |
| R46 | 2264.0     | 53.6645     |
| R47 | 2534.0     | 57.625      |
| R48 | 2202.0     | 52.8003     |
| R49 | 2292.0     | 54.0297     |
| R50 | 2277.0     | 53.8563     |
| R51 | 2523.0     | 57.3226     |
| R52 | 2419.0     | 55.3442     |
| R53 | 2302.0     | 54.2118     |
| R54 | 2423.0     | 55.2956     |
| R55 | 2393.0     | 55.2973     |
| R56 | 2325.0     | 54.0728     |
| R57 | 2167.0     | 52.3082     |
| R58 | 2515.0     | 56.4181     |
| R59 | 2195.0     | 52.6626     |
| R60 | 2386.0     | 54.9368     |
| R61 | 2413.0     | 55.2032     |
| R62 | 2336.0     | 54.4041     |
| R63 | 2509.0     | 57.1509     |
| R64 | 2321.0     | 54.2183     |
| R65 | 2473.0     | 56.0713     |
| R66 | 2415.0     | 55.1542     |
| R67 | 2337.0     | 54.3995     |
| R68 | 2607.0     | 58.0236     |
| R69 | 2275.0     | 53.6458     |
| R70 | 2580.0     | 57.1253     |
| R71 | 2431.0     | 55.6644     |
| R72 | 2022.0     | 50.8936     |
| R73 | 2637.0     | 57.8636     |
| R74 | 2173.0     | 52.497      |
| R75 | 2457.0     | 55.7355     |
| R76 | 2299.0     | 54.0809     |
| R77 | 2402.0     | 55.0423     |
| R78 | 2465.0     | 55.9482     |
| R79 | 2307.0     | 54.1034     |

|      | FilledArea | CircDiamete |
|------|------------|-------------|
| R80  | 2491.0     | 56.4411     |
| R81  | 2363.0     | 54.8216     |
| R82  | 2540.0     | 56.8558     |
| R83  | 2209.0     | 53.5119     |
| R84  | 2302.0     | 54.0322     |
| R85  | 2579.0     | 57.1011     |
| R86  | 2359.0     | 54.9194     |
| R87  | 2629.0     | 57.7226     |
| R88  | 2378.0     | 54.9124     |
| R89  | 2564.0     | 56.9075     |
| R90  | 2401.0     | 55.2779     |
| R91  | 2344.0     | 54.3236     |
| R92  | 2693.0     | 58.6762     |
| R93  | 2367.0     | 54.6353     |
| R94  | 2525.0     | 56.6326     |
| R95  | 2448.0     | 55.7301     |
| R96  | 2260.0     | 53.7248     |
| R97  | 2669.0     | 58.3209     |
| R98  | 2410.0     | 55.3911     |
| R99  | 2384.0     | 54.8803     |
| R100 | 2434.0     | 55.4636     |
| R101 | 2577.0     | 57.2283     |
| R102 | 2395.0     | 55.0361     |
| R103 | 2451.0     | 55.6854     |
| R104 | 2610.0     | 57.771      |
| R105 | 2426.0     | 55.9656     |
| R106 | 2520.0     | 56.5984     |
| R107 | 2343.0     | 54.6553     |
| R108 | 2437.0     | 55.4899     |
| R109 | 2638.0     | 58.0958     |
| R110 | 2532.0     | 56.6683     |
| R111 | 2581.0     | 57.3283     |
| R112 | 2371.0     | 55.1474     |
| R113 | 2407.0     | 55.3354     |
| R114 | 2552.0     | 57.0706     |
| R115 | 2702.0     | 59.8972     |
| R116 | 2618.0     | 58.3722     |
| R117 | 2341.0     | 55.4722     |

**Fig. S2-b2.** (a) TEM image of the bottom surface of the AAO membrane with the chemical etching for 10 min corresponding the analyzed nanochannels after the thresholding. (b) Measurements of the sizes (diameter, unit: nm) of the analyzed nanochannels on the bottom surface of the AAO membrane.

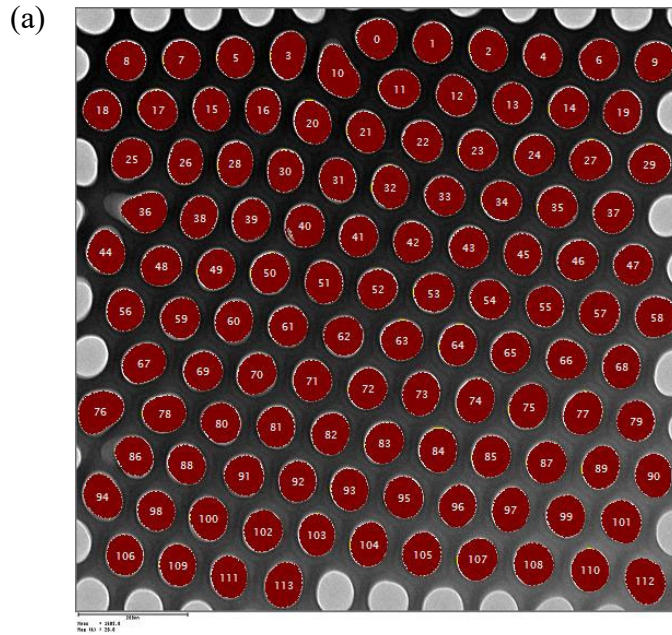

(b)

|     | FilledArea | CircDiamete |
|-----|------------|-------------|
| R0  | 4436.0     | 75.0419     |
| R1  | 4305.0     | 73.8115     |
| R2  | 4334.0     | 74.2148     |
| R3  | 4620.0     | 78.1811     |
| R4  | 4375.0     | 74.635      |
| R5  | 4148.0     | 72.5747     |
| R6  | 4306.0     | 73.9202     |
| R7  | 3965.0     | 70.7805     |
| R8  | 4199.0     | 72.8204     |
| R9  | 4241.0     | 73.2941     |
| R10 | 5493.0     | 87.4851     |
| R11 | 4308.0     | 73.8878     |
| R12 | 4351.0     | 74.2685     |
| R13 | 4311.0     | 73.8504     |
| R14 | 4385.0     | 74.4691     |
| R15 | 4232.0     | 73.5419     |
| R16 | 4263.0     | 74.3756     |
| R17 | 4231.0     | 73.284      |
| R18 | 4106.0     | 72.1669     |
| R19 | 4409.0     | 75.0037     |
| R20 | 4396.0     | 75.1272     |
| R21 | 4276.0     | 73.8147     |
| R22 | 4431.0     | 75.0577     |
| R23 | 4263.0     | 73.4885     |
| R24 | 4393.0     | 74.7402     |
| R25 | 4470.0     | 75.5554     |
| R26 | 4245.0     | 74.1824     |
| R27 | 4520.0     | 75.641      |
| R28 | 4303.0     | 74.6337     |
| R29 | 4478.0     | 75.2952     |
| R30 | 4192.0     | 73.1995     |
| R31 | 4319.0     | 74.3011     |
| R32 | 4358.0     | 74.5772     |
| R33 | 4268.0     | 73.449      |
| R34 | 4317.0     | 73.8885     |
| R35 | 4465.0     | 75.2224     |
| R36 | 4856.0     | 80.2167     |
| R37 | 4523.0     | 75.7924     |

|     | FilledArea | CircDiamete |
|-----|------------|-------------|
| R38 | 4222.0     | 73.6575     |
| R39 | 4268.0     | 73.8445     |
| R40 | 4568.0     | 76.0984     |
| R41 | 4245.0     | 73.2745     |
| R42 | 4237.0     | 73.2824     |
| R43 | 4455.0     | 75.1267     |
| R44 | 4487.0     | 76.1703     |
| R45 | 4313.0     | 74.0724     |
| R46 | 4468.0     | 75.2709     |
| R47 | 4298.0     | 73.7585     |
| R48 | 4387.0     | 74.5602     |
| R49 | 4177.0     | 72.9285     |
| R50 | 4368.0     | 74.591      |
| R51 | 4339.0     | 74.465      |
| R52 | 4306.0     | 73.8482     |
| R53 | 4315.0     | 73.96       |
| R54 | 4255.0     | 73.3879     |
| R55 | 4176.0     | 72.7508     |
| R56 | 4275.0     | 73.783      |
| R57 | 4723.0     | 77.4459     |
| R58 | 4819.0     | 78.3528     |
| R59 | 4354.0     | 74.504      |
| R60 | 4289.0     | 74.023      |
| R61 | 4208.0     | 72.9745     |
| R62 | 4259.0     | 73.7248     |
| R63 | 4604.0     | 76.421      |
| R64 | 4294.0     | 73.8242     |
| R65 | 4378.0     | 74.5994     |
| R66 | 4348.0     | 74.2547     |
| R67 | 4739.0     | 78.0809     |
| R68 | 4518.0     | 76.0376     |
| R69 | 4178.0     | 72.6368     |
| R70 | 4378.0     | 74.9031     |
| R71 | 4385.0     | 74.5639     |
| R72 | 4397.0     | 74.6471     |
| R73 | 4485.0     | 75.7311     |
| R74 | 4645.0     | 77.1648     |
| R75 | 4832.0     | 78.884      |

|      | FilledArea | CircDiamete |
|------|------------|-------------|
| R76  | 5159.0     | 82.4848     |
| R77  | 4644.0     | 77.0534     |
| R78  | 4473.0     | 75.5718     |
| R79  | 4209.0     | 73.099      |
| R80  | 4347.0     | 74.2592     |
| R81  | 4269.0     | 73.779      |
| R82  | 4394.0     | 74.8334     |
| R83  | 4418.0     | 74.9646     |
| R84  | 4636.0     | 77.0618     |
| R85  | 4532.0     | 75.8982     |
| R86  | 4089.0     | 72.7373     |
| R87  | 4602.0     | 76.4336     |
| R88  | 4132.0     | 72.4152     |
| R89  | 4453.0     | 75.6278     |
| R90  | 4453.0     | 75.8099     |
| R91  | 4391.0     | 74.6935     |
| R92  | 4242.0     | 73.4376     |
| R93  | 4409.0     | 75.0307     |
| R94  | 4648.0     | 78.1886     |
| R95  | 4485.0     | 75.4773     |
| R96  | 4327.0     | 74.2688     |
| R97  | 4570.0     | 76.6463     |
| R98  | 4124.0     | 72.359      |
| R99  | 4508.0     | 75.8343     |
| R100 | 4501.0     | 76.0066     |
| R101 | 4695.0     | 77.394      |
| R102 | 4456.0     | 75.1711     |
| R103 | 4224.0     | 73.4156     |
| R104 | 4579.0     | 76.7955     |
| R105 | 4663.0     | 77.1009     |
| R106 | 4174.0     | 72.9151     |
| R107 | 4649.0     | 76.9123     |
| R108 | 4674.0     | 77.0009     |
| R109 | 4282.0     | 74.0181     |
| R110 | 4532.0     | 76.1444     |
| R111 | 4253.0     | 73.7926     |
| R112 | 5042.0     | 80.9738     |
| R113 | 4664.0     | 77.5866     |

**Fig. S2-c1.** (a) TEM image of the top surface of the AAO membrane with the chemical etching for 35 min corresponding the analyzed nanochannels after the thresholding. (b) Measurements of the sizes (diameter, unit: nm) of the analyzed nanochannels on the top surface of the AAO membranes.



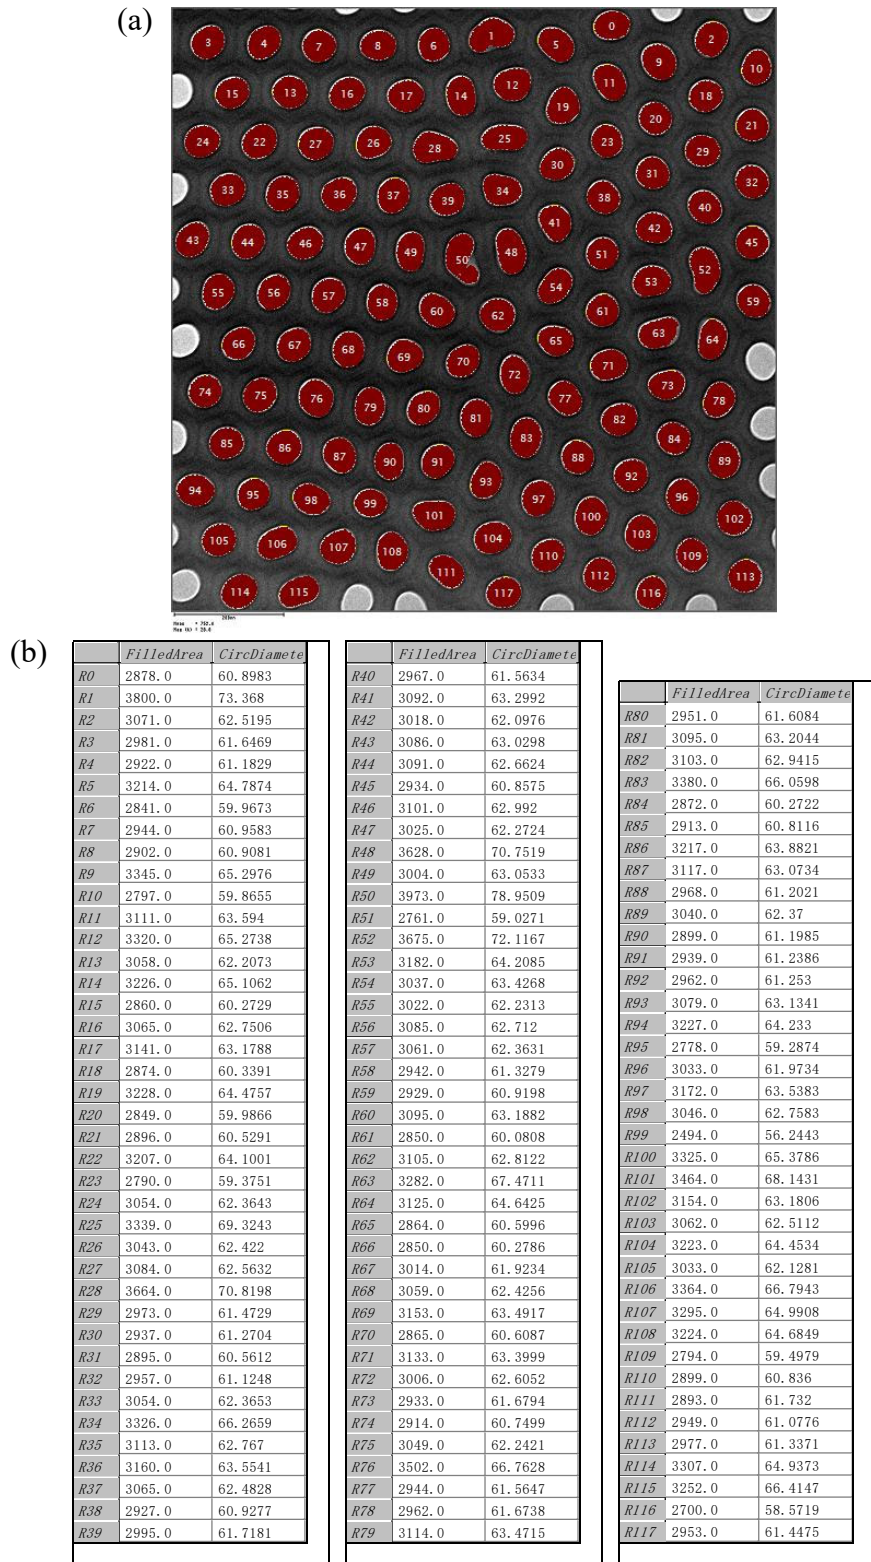

**Fig. S2-c2.** (a) TEM image of the bottom surface of the AAO membrane with the chemical etching for 35 min corresponding the analyzed nanochannels after the thresholding. (b) Measurements of the sizes (diameter, unit: nm) of the analyzed nanochannels on the bottom surface of the AAO membrane.

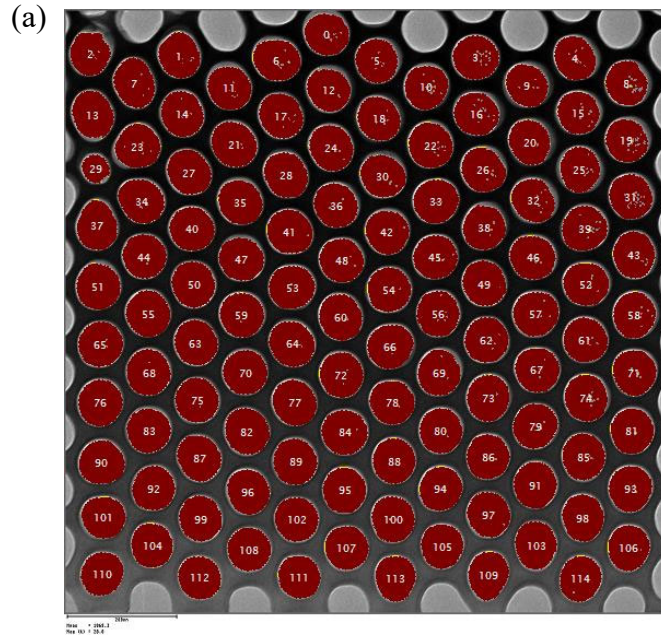

(b)

|     | FilledArea | CircDiamete |
|-----|------------|-------------|
| R0  | 5164.0     | 81.3076     |
| R1  | 5190.0     | 81.5911     |
| R2  | 4797.0     | 79.1318     |
| R3  | 5598.0     | 84.2104     |
| R4  | 5023.0     | 80.3729     |
| R5  | 5145.0     | 80.9501     |
| R6  | 5479.0     | 83.9666     |
| R7  | 5486.0     | 84.5675     |
| R8  | 5136.0     | 81.1881     |
| R9  | 4945.0     | 79.5335     |
| R10 | 5320.0     | 82.3126     |
| R11 | 5262.0     | 82.0333     |
| R12 | 5153.0     | 81.5302     |
| R13 | 5417.0     | 84.1189     |
| R14 | 5349.0     | 82.5674     |
| R15 | 4981.0     | 79.6637     |
| R16 | 5341.0     | 82.4525     |
| R17 | 5433.0     | 83.1568     |
| R18 | 5245.0     | 81.7281     |
| R19 | 4999.0     | 79.9145     |
| R20 | 5099.0     | 80.945      |
| R21 | 5657.0     | 84.9728     |
| R22 | 5561.0     | 84.0533     |
| R23 | 5451.0     | 83.4536     |
| R24 | 5588.0     | 84.4297     |
| R25 | 4987.0     | 79.9528     |
| R26 | 5368.0     | 82.9008     |
| R27 | 5407.0     | 83.0974     |
| R28 | 5448.0     | 83.5516     |
| R29 | 2189.0     | 53.3376     |
| R30 | 5297.0     | 82.2954     |
| R31 | 5319.0     | 82.2438     |
| R32 | 5169.0     | 81.4144     |
| R33 | 5522.0     | 83.6236     |
| R34 | 5532.0     | 84.2442     |
| R35 | 5440.0     | 83.3723     |
| R36 | 5339.0     | 82.4565     |
| R37 | 5478.0     | 84.6049     |
| R38 | 5254.0     | 82.0216     |

|     | FilledArea | CircDiamete |
|-----|------------|-------------|
| R39 | 5604.0     | 84.384      |
| R40 | 5427.0     | 82.9761     |
| R41 | 5551.0     | 83.9997     |
| R42 | 5265.0     | 81.8817     |
| R43 | 5390.0     | 82.9505     |
| R44 | 5306.0     | 82.061      |
| R45 | 5330.0     | 82.2311     |
| R46 | 5562.0     | 84.0964     |
| R47 | 5282.0     | 81.9485     |
| R48 | 5295.0     | 82.0327     |
| R49 | 5454.0     | 83.2543     |
| R50 | 5481.0     | 83.5308     |
| R51 | 5610.0     | 84.534      |
| R52 | 5450.0     | 83.2479     |
| R53 | 5521.0     | 83.7778     |
| R54 | 5349.0     | 82.465      |
| R55 | 5593.0     | 84.2676     |
| R56 | 5368.0     | 82.6404     |
| R57 | 5632.0     | 84.7561     |
| R58 | 5458.0     | 83.4161     |
| R59 | 5490.0     | 83.4725     |
| R60 | 5499.0     | 83.6823     |
| R61 | 5439.0     | 83.0819     |
| R62 | 5462.0     | 83.2946     |
| R63 | 5405.0     | 82.9261     |
| R64 | 5677.0     | 85.0142     |
| R65 | 5536.0     | 83.7704     |
| R66 | 5567.0     | 84.2145     |
| R67 | 5484.0     | 83.5169     |
| R68 | 5590.0     | 84.2554     |
| R69 | 5415.0     | 83.1036     |
| R70 | 5480.0     | 83.3843     |
| R71 | 5459.0     | 83.4139     |
| R72 | 5465.0     | 83.2398     |
| R73 | 5508.0     | 83.7613     |
| R74 | 5591.0     | 84.3519     |
| R75 | 5378.0     | 82.663      |
| R76 | 5671.0     | 84.8092     |
| R77 | 5560.0     | 84.0689     |

|      | FilledArea | CircDiamete |
|------|------------|-------------|
| R78  | 5392.0     | 82.792      |
| R79  | 5483.0     | 83.4755     |
| R80  | 5400.0     | 82.9098     |
| R81  | 5436.0     | 83.1403     |
| R82  | 5642.0     | 84.7981     |
| R83  | 5398.0     | 82.967      |
| R84  | 5702.0     | 85.0459     |
| R85  | 5518.0     | 83.8685     |
| R86  | 5275.0     | 81.9675     |
| R87  | 5483.0     | 83.811      |
| R88  | 5408.0     | 82.7909     |
| R89  | 5552.0     | 84.029      |
| R90  | 5546.0     | 84.0274     |
| R91  | 5495.0     | 83.6185     |
| R92  | 5250.0     | 81.7522     |
| R93  | 5468.0     | 83.4888     |
| R94  | 5297.0     | 82.022      |
| R95  | 5466.0     | 83.3232     |
| R96  | 5322.0     | 82.4596     |
| R97  | 5365.0     | 82.6228     |
| R98  | 5371.0     | 82.8105     |
| R99  | 5364.0     | 82.58       |
| R100 | 5489.0     | 83.6192     |
| R101 | 5123.0     | 80.8299     |
| R102 | 5323.0     | 82.2692     |
| R103 | 5489.0     | 84.0531     |
| R104 | 5172.0     | 81.1133     |
| R105 | 5228.0     | 81.5523     |
| R106 | 5258.0     | 81.9099     |
| R107 | 5296.0     | 81.9956     |
| R108 | 5227.0     | 81.4489     |
| R109 | 5334.0     | 83.2071     |
| R110 | 5120.0     | 80.8192     |
| R111 | 5056.0     | 80.2532     |
| R112 | 5143.0     | 80.9187     |
| R113 | 5116.0     | 81.0385     |
| R114 | 5263.0     | 81.903      |

**Fig. S2-d1.** (a) TEM image of the top surface of the AAO membrane with the chemical etching for 60 min corresponding the analyzed nanochannels after the thresholding. (b) Measurements of the sizes (diameter, unit: nm) of the analyzed nanochannels on the top surface of the AAO membrane.

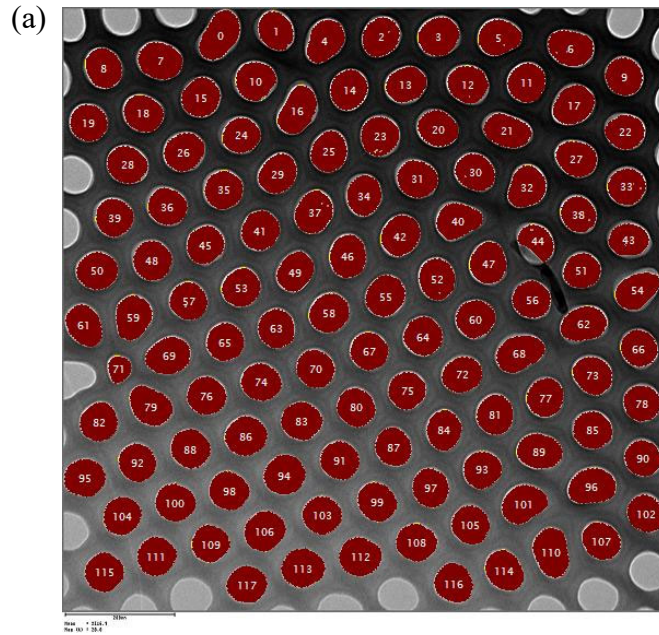

(b)

|     | FilledArea | CircDiamete |
|-----|------------|-------------|
| R0  | 4925.0     | 82.9708     |
| R1  | 3767.0     | 69.4588     |
| R2  | 4044.0     | 71.884      |
| R3  | 4341.0     | 74.3388     |
| R4  | 4280.0     | 75.7398     |
| R5  | 4205.0     | 73.9961     |
| R6  | 4483.0     | 76.7119     |
| R7  | 4514.0     | 76.2178     |
| R8  | 4001.0     | 71.4952     |
| R9  | 3863.0     | 69.908      |
| R10 | 4276.0     | 74.1223     |
| R11 | 4068.0     | 71.8126     |
| R12 | 4176.0     | 73.0008     |
| R13 | 3997.0     | 71.5954     |
| R14 | 4152.0     | 72.5951     |
| R15 | 4118.0     | 72.3579     |
| R16 | 4725.0     | 81.0487     |
| R17 | 4397.0     | 75.524      |
| R18 | 4043.0     | 71.803      |
| R19 | 3815.0     | 69.4566     |
| R20 | 3961.0     | 71.0614     |
| R21 | 4275.0     | 76.3001     |
| R22 | 3710.0     | 68.8924     |
| R23 | 4108.0     | 72.3695     |
| R24 | 3687.0     | 68.4515     |
| R25 | 4055.0     | 72.0059     |
| R26 | 4203.0     | 73.4156     |
| R27 | 4048.0     | 72.2553     |
| R28 | 4199.0     | 73.1195     |
| R29 | 4100.0     | 72.6159     |
| R30 | 4015.0     | 71.6691     |
| R31 | 4167.0     | 73.0086     |
| R32 | 4362.0     | 75.4902     |
| R33 | 3845.0     | 69.883      |
| R34 | 3871.0     | 70.6035     |
| R35 | 4059.0     | 71.8989     |
| R36 | 3993.0     | 71.4225     |
| R37 | 4386.0     | 75.1341     |
| R38 | 3544.0     | 67.1801     |
| R39 | 3952.0     | 70.8573     |

|     | FilledArea | CircDiamete |
|-----|------------|-------------|
| R40 | 4359.0     | 76.9223     |
| R41 | 4093.0     | 72.0994     |
| R42 | 4350.0     | 74.5443     |
| R43 | 3613.0     | 68.3328     |
| R44 | 3158.0     | 67.3926     |
| R45 | 3907.0     | 70.5791     |
| R46 | 4345.0     | 74.595      |
| R47 | 4238.0     | 73.6776     |
| R48 | 4209.0     | 73.2779     |
| R49 | 3887.0     | 70.9235     |
| R50 | 4238.0     | 73.3324     |
| R51 | 3588.0     | 67.4849     |
| R52 | 4163.0     | 72.977      |
| R53 | 4060.0     | 71.7301     |
| R54 | 4244.0     | 76.2616     |
| R55 | 4421.0     | 74.9259     |
| R56 | 3914.0     | 70.4056     |
| R57 | 3886.0     | 70.2241     |
| R58 | 4306.0     | 73.9191     |
| R59 | 4440.0     | 76.3253     |
| R60 | 4063.0     | 71.8987     |
| R61 | 4068.0     | 73.0575     |
| R62 | 4411.0     | 76.7216     |
| R63 | 3950.0     | 70.9213     |
| R64 | 4113.0     | 72.2885     |
| R65 | 3901.0     | 70.3256     |
| R66 | 3705.0     | 68.5379     |
| R67 | 3922.0     | 70.4532     |
| R68 | 4676.0     | 79.7873     |
| R69 | 4524.0     | 76.783      |
| R70 | 3970.0     | 71.045      |
| R71 | 1772.0     | 47.9722     |
| R72 | 3946.0     | 70.9616     |
| R73 | 4114.0     | 72.6501     |
| R74 | 4121.0     | 72.3623     |
| R75 | 3861.0     | 69.9345     |
| R76 | 4084.0     | 71.9785     |
| R77 | 3943.0     | 70.8099     |
| R78 | 3657.0     | 68.1078     |
| R79 | 4466.0     | 76.9699     |

|      | FilledArea | CircDiamete |
|------|------------|-------------|
| R80  | 3996.0     | 71.3063     |
| R81  | 4064.0     | 71.9966     |
| R82  | 4045.0     | 71.8055     |
| R83  | 4238.0     | 73.4956     |
| R84  | 3838.0     | 70.1307     |
| R85  | 4007.0     | 71.3948     |
| R86  | 4524.0     | 75.762      |
| R87  | 3828.0     | 69.8811     |
| R88  | 4212.0     | 73.2766     |
| R89  | 4410.0     | 75.7436     |
| R90  | 3634.0     | 67.8122     |
| R91  | 4068.0     | 71.8835     |
| R92  | 3936.0     | 70.8565     |
| R93  | 3921.0     | 70.7032     |
| R94  | 4477.0     | 75.523      |
| R95  | 4298.0     | 74.214      |
| R96  | 4760.0     | 79.6593     |
| R97  | 3914.0     | 70.62       |
| R98  | 4234.0     | 73.5587     |
| R99  | 4158.0     | 72.943      |
| R100 | 4184.0     | 73.3069     |
| R101 | 4635.0     | 78.302      |
| R102 | 3804.0     | 69.6962     |
| R103 | 4060.0     | 71.9818     |
| R104 | 3985.0     | 71.3824     |
| R105 | 3989.0     | 71.25       |
| R106 | 4468.0     | 75.7798     |
| R107 | 3928.0     | 70.9637     |
| R108 | 4197.0     | 73.2216     |
| R109 | 3853.0     | 70.6044     |
| R110 | 4835.0     | 80.9928     |
| R111 | 4131.0     | 72.9881     |
| R112 | 4523.0     | 76.1875     |
| R113 | 4591.0     | 76.955      |
| R114 | 4233.0     | 74.2212     |
| R115 | 4171.0     | 73.2254     |
| R116 | 4165.0     | 73.1977     |
| R117 | 4129.0     | 73.0797     |

**Fig. S2-d2.** (a) TEM image of the bottom surface of the AAO membrane with the chemical etching for 60 min corresponding the analyzed nanochannels after the thresholding. (b) Measurements of the sizes (diameter, unit: nm) of the analyzed nanochannels on the bottom surface of the AAO membrane.

**3. Selected area electron diffraction patterns of the AAO membranes with different nanochannel sizes after partially covering the central transmitted beam by a beam stopper.**

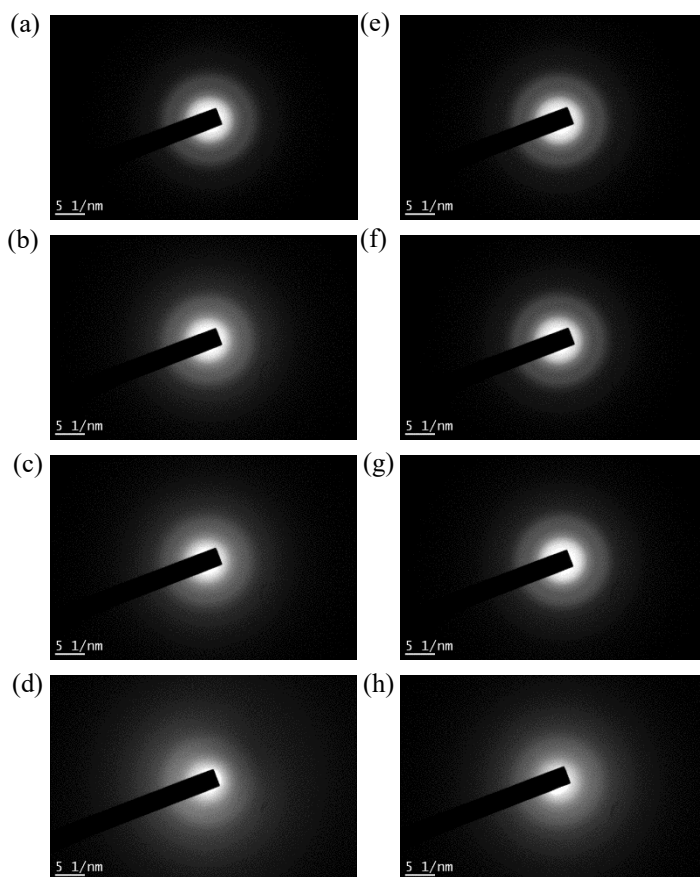

**Fig. S3** Selected area electron diffraction patterns of the AAO membranes with different nanochannel sizes after partially covering the central transmitted beam by a beam stopper. (a), (b), (c) and (d) Top surfaces of the nanochannels in the AAO membranes formed after etching the through-channel membranes immersed in a 5 %  $\text{H}_3\text{PO}_4$  solution at 30 °C for 0, 10, 35 and 60 min, respectively, corresponding to the nanochannel sizes of  $52.9\pm 3.0$ ,  $64.6\pm 3.6$ ,  $75.0\pm 2.2$  and  $82.6\pm 3.0$  nm. (e), (f), (g) and (h) Bottom surfaces of the nanochannels in the same membranes formed after etching the through-channel membranes for 0, 10, 35, and 60 min, respectively, corresponding to the nanochannel sizes of  $37.1\pm 2.0$ ,  $54.8\pm 2.4$ ,  $62.9\pm 3.0$  and  $72.6\pm 3.7$  nm.

**4. Statistic measurements of 300 nanochannel spacings and their distributions on the top and the bottom surfaces for every AAO membrane by the DM software**

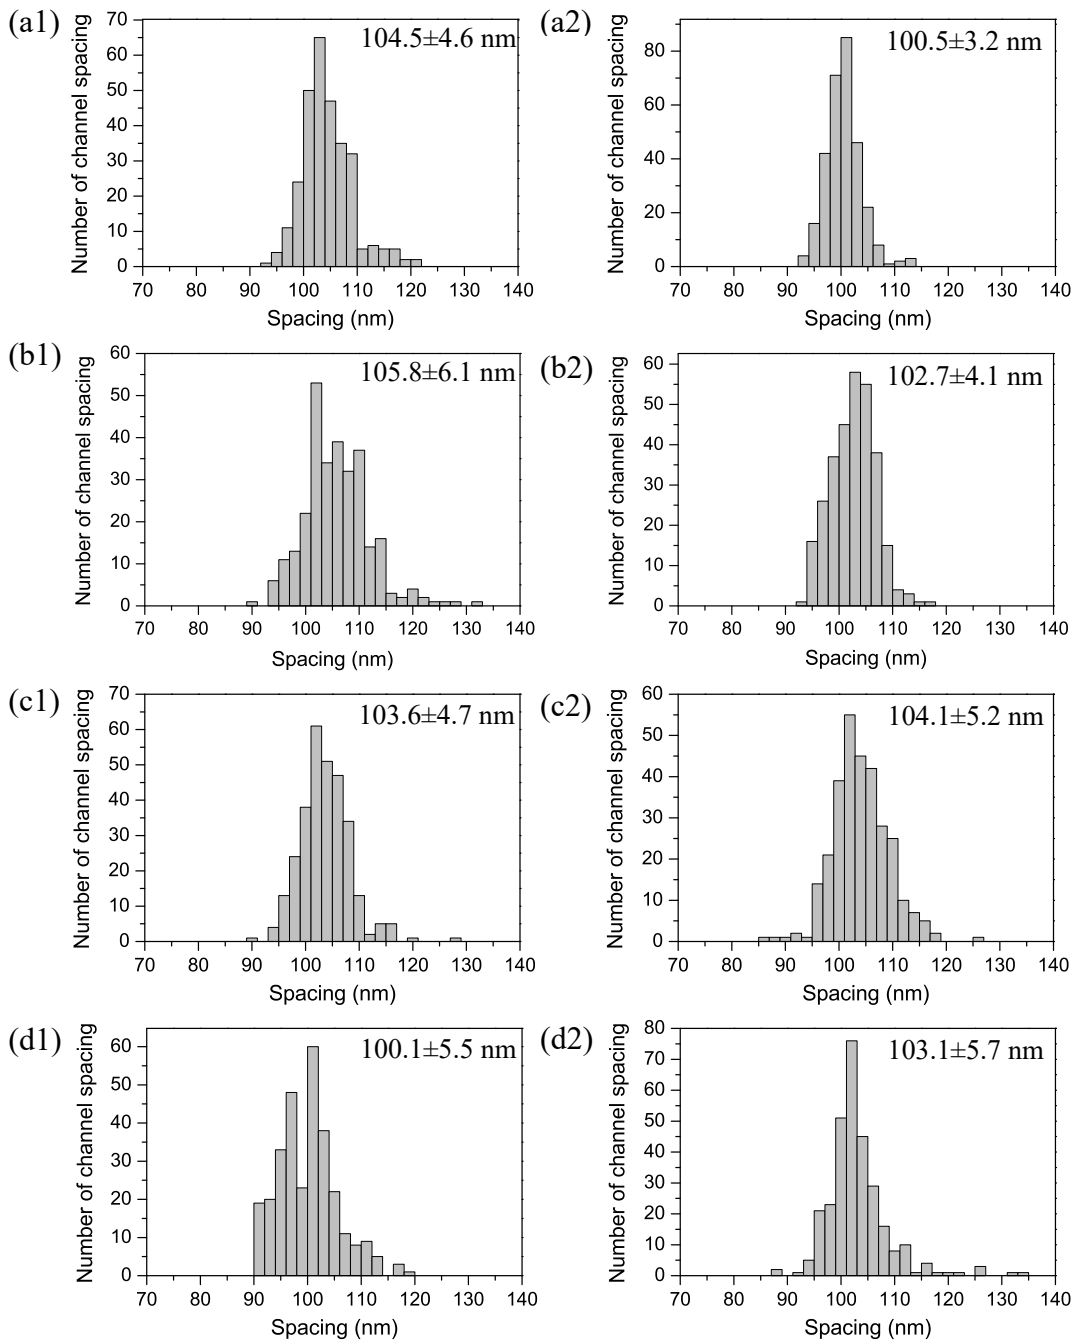

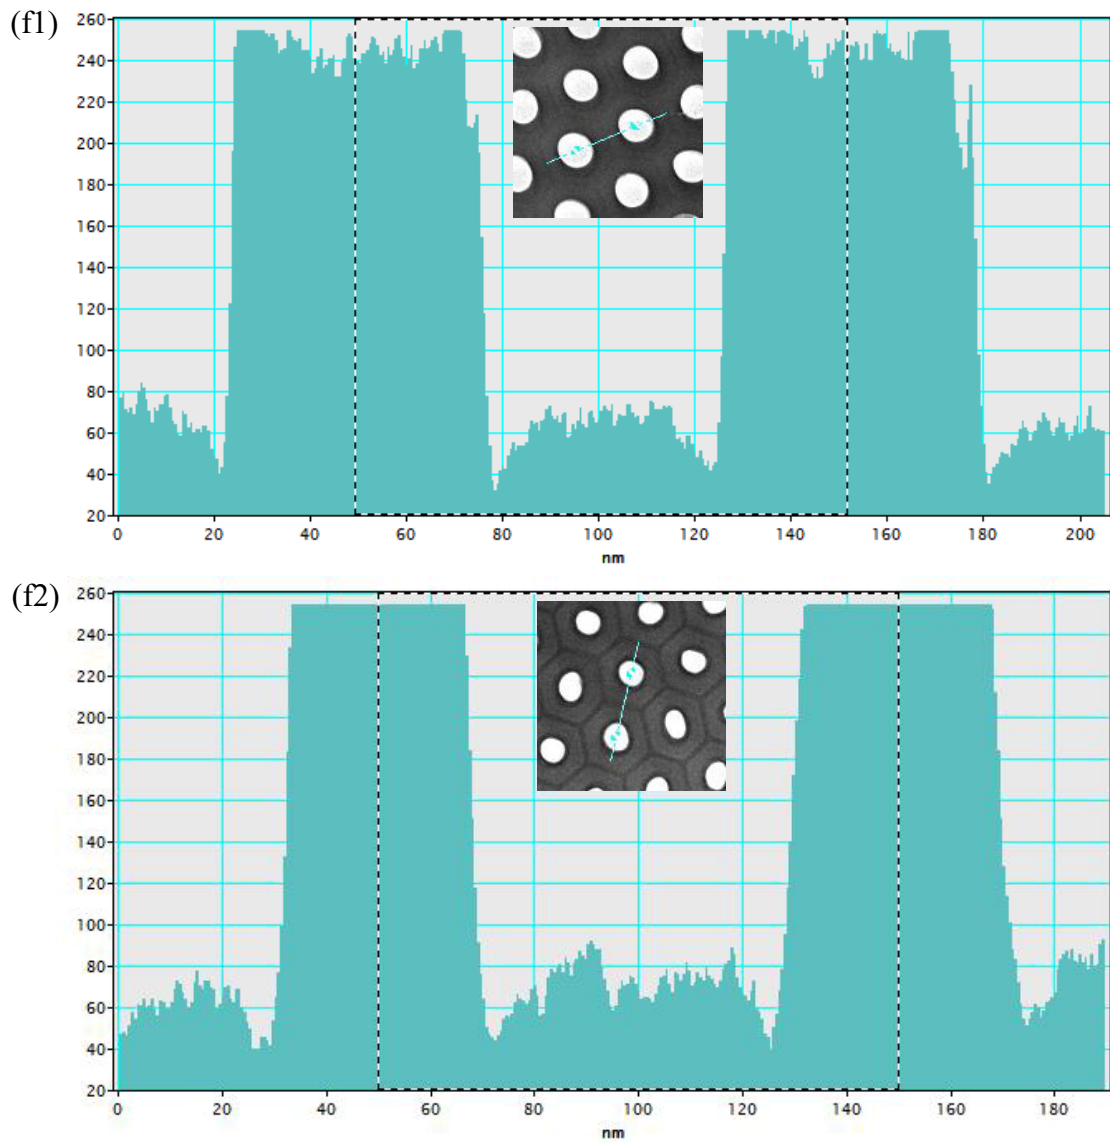

**Fig. S4.** Histograms of 300 nanochannel spacing on the top and bottom surfaces for every AAO membrane. (a1), (b1), (c1), and (d1) show the spacing distributions on the top surface of the membranes after the chemical etching for 0, 10, 35, and 60 min, respectively. (a2), (b2), (c2), and (d2) correspond to those on the bottom surfaces in the same membranes, respectively. (f1) and (f2) demonstrate the line profiles from one of two adjacent nanochannels by the DM software, respectively, the widths of the dashed-line frames represent the spacing of two adjacent nanochannels, insets: typical images of the spacing measurements based on the line profiles.

## 5. Reflection spectra of the top and the bottom surfaces of the truncated conical nanochannels in the as-prepared AAO membrane

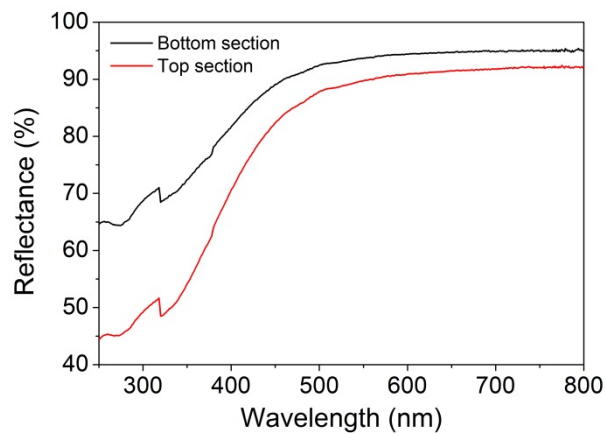

**Fig. S5.** Reflection spectra of the top and the bottom surfaces of the as-prepared 70  $\mu\text{m}$  thick AAO membrane by using a UV-Vis-NIR spectrophotometer with an integrating sphere (PerkinElmer Lambda 750S).

## 6. Current density with anodization time at the self-ordering growth (steady-state) process

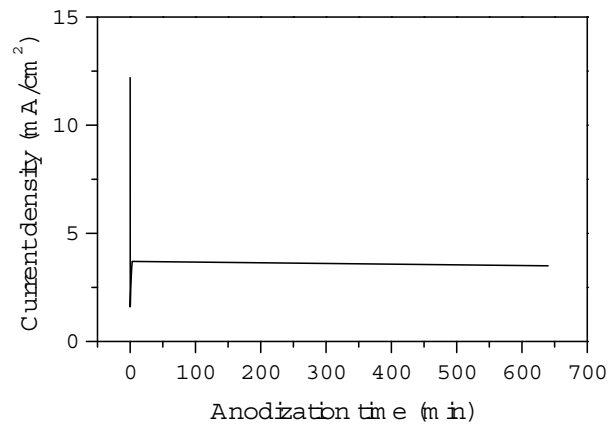

**Fig. S6.** Curve of the current density with the anodization time during the self-ordering growth of the AAO membranes (under the anodization voltage of 40 V at 13 °C).



**7. Plot the experimental data of current density at different anodization temperatures**

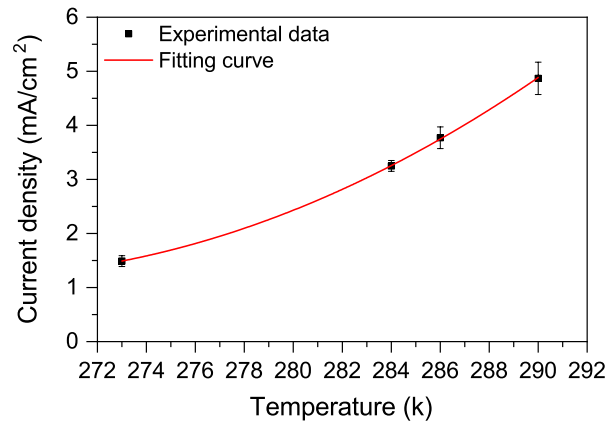

**Fig. S7.** Current density during the anodization process with the electrolyte temperature and the fit curve according the equation (3) in the text. The fitted results are  $i_0=1.45\times 10^5$ ,  $i_M=1.00\times 10^8$ ,  $\alpha=3300$ ,  $\beta=4800$ .

## 8. Etching as-prepared through-channel AAO membranes based on the temperature gradient regime to achieve the nanochannels with cylindrical geometry

The as-prepared through-channel AAO membranes through a drying treatment were floated on the surface of a 5 %  $\text{H}_3\text{PO}_4$  solution (Fig. S8), where the  $\text{H}_3\text{PO}_4$  solution was put in a petri dish that was partially immersed into a digital-control water bath with a temperature of 30 °C by control of a heating element, the temperature of the bottom surface of the AAO membranes equals to that of the  $\text{H}_3\text{PO}_4$  solution, which can be measured by a thermocouple fixed into the water bath. The digital-control water bath was put into a horizontal refrigerator with a surrounding temperature of 8 °C, the surrounding temperature can be controlled by the refrigerator, the temperature of the top surfaces of the AAO membrane exposed to the surrounding were measured by a mercury thermometer. The bottom surfaces of the membranes are in contact with the surface of the  $\text{H}_3\text{PO}_4$  solution with a high temperature of 30 °C by control of a constant temperature in a digital-control water bath, while the top surfaces are exposed to the surrounding with a low temperature of 8 °C, this gives rise to a temperature gradient of the solution in the nanochannels from down to up based on a capillary phenomenon. In the case, the enlarging rate of the nanochannels on the bottom segment is larger than that on the top segment during the etching process, which results in the decrease of the original size deviation along the long axis of the nanochannels (Fig. 5a in the text). For the as-prepared through channel AAO membranes with different thicknesses (e.g., 27  $\mu\text{m}$ , 60  $\mu\text{m}$ , 70  $\mu\text{m}$  and 93  $\mu\text{m}$ ), the etching time corresponds to 2 min, 5 min, 10 min and 40 min, respectively.

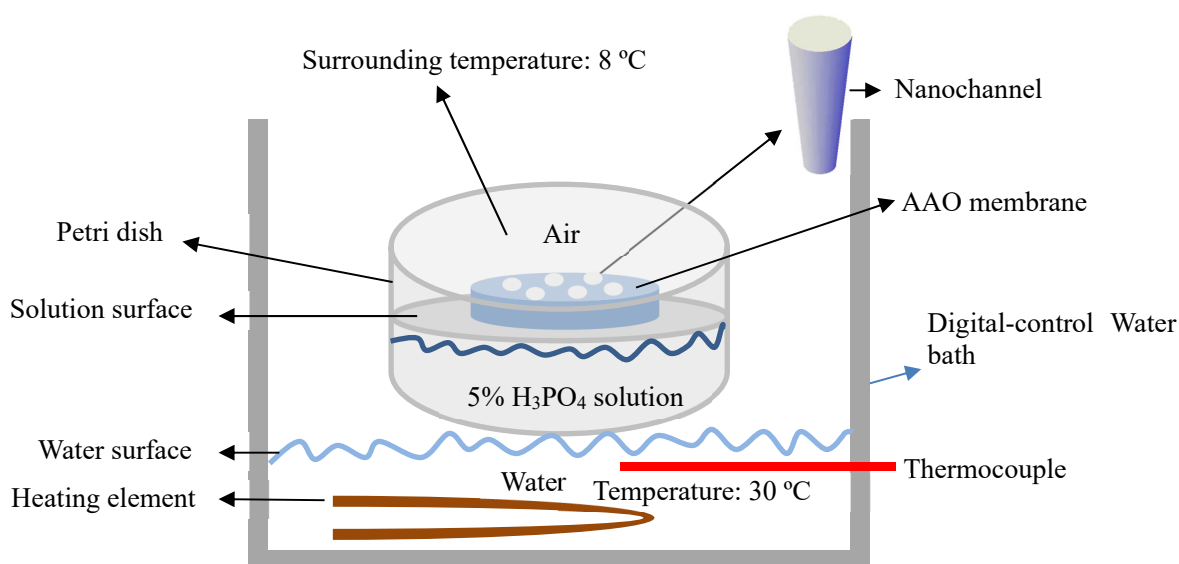

**Fig. S8.** Schematic illustration of the setup of the etching method based on the temperature gradient regime.

**9. Morphologies and size distributions of the top and the bottom nanochannels in the through-channel AAO membranes formed at the constant voltage of 40 V and different electrolyte (anodization) temperatures**

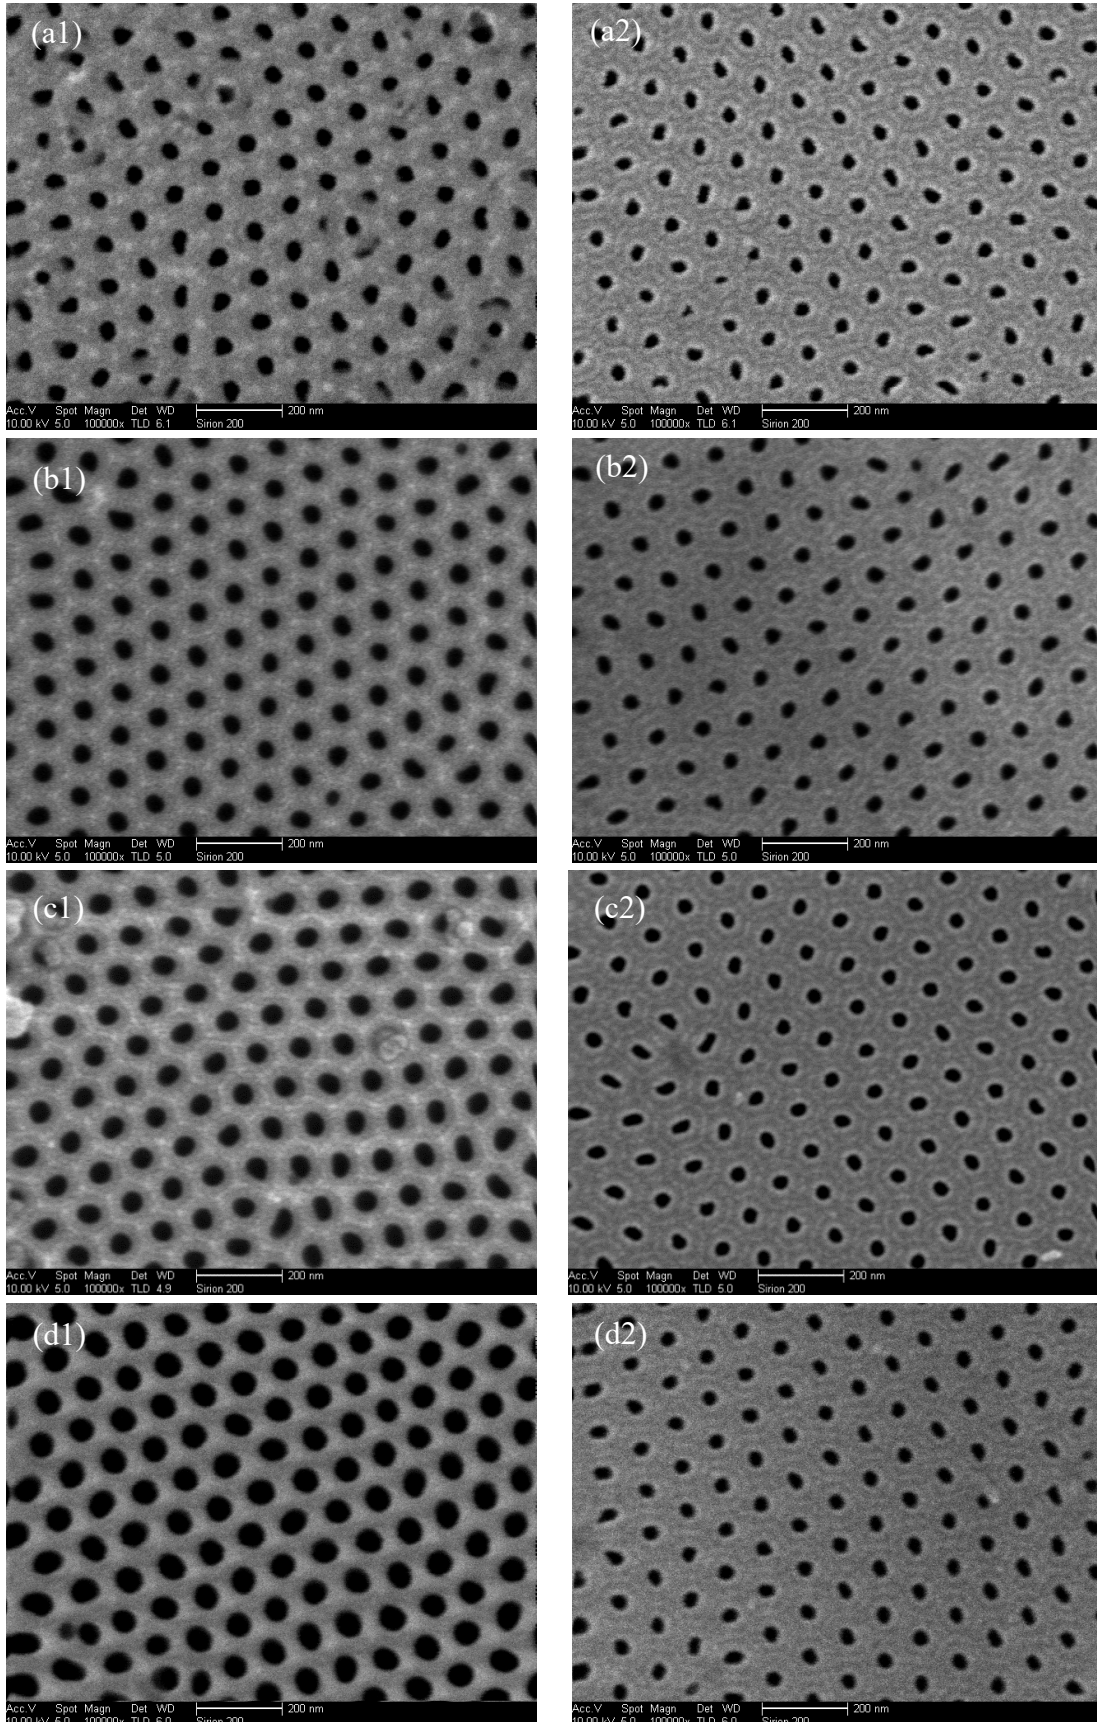

**Fig. S9.** SEM images of the top and bottom surfaces of the through-channel AAO membranes formed at the constant voltage of 40 V and different anodization temperatures, all of the through-channel membranes are not through any etching treatment. (a1), (a2) Top and bottom surfaces of a 27  $\mu\text{m}$  thick membrane prepared through the second anodization at the constant temperature of 0°C for 660 min, respectively. (b1), (b2) Top and bottom surfaces of a 60  $\mu\text{m}$  thick membrane prepared at 11°C for 720 min, respectively. (c1), (c2) Top and bottom surfaces of a 70  $\mu\text{m}$  thick membrane prepared at 13°C for 640 min, respectively. (d1), (d2) Top and bottom surfaces of a 93  $\mu\text{m}$  thick membrane prepared at 17°C for 660 min, respectively.

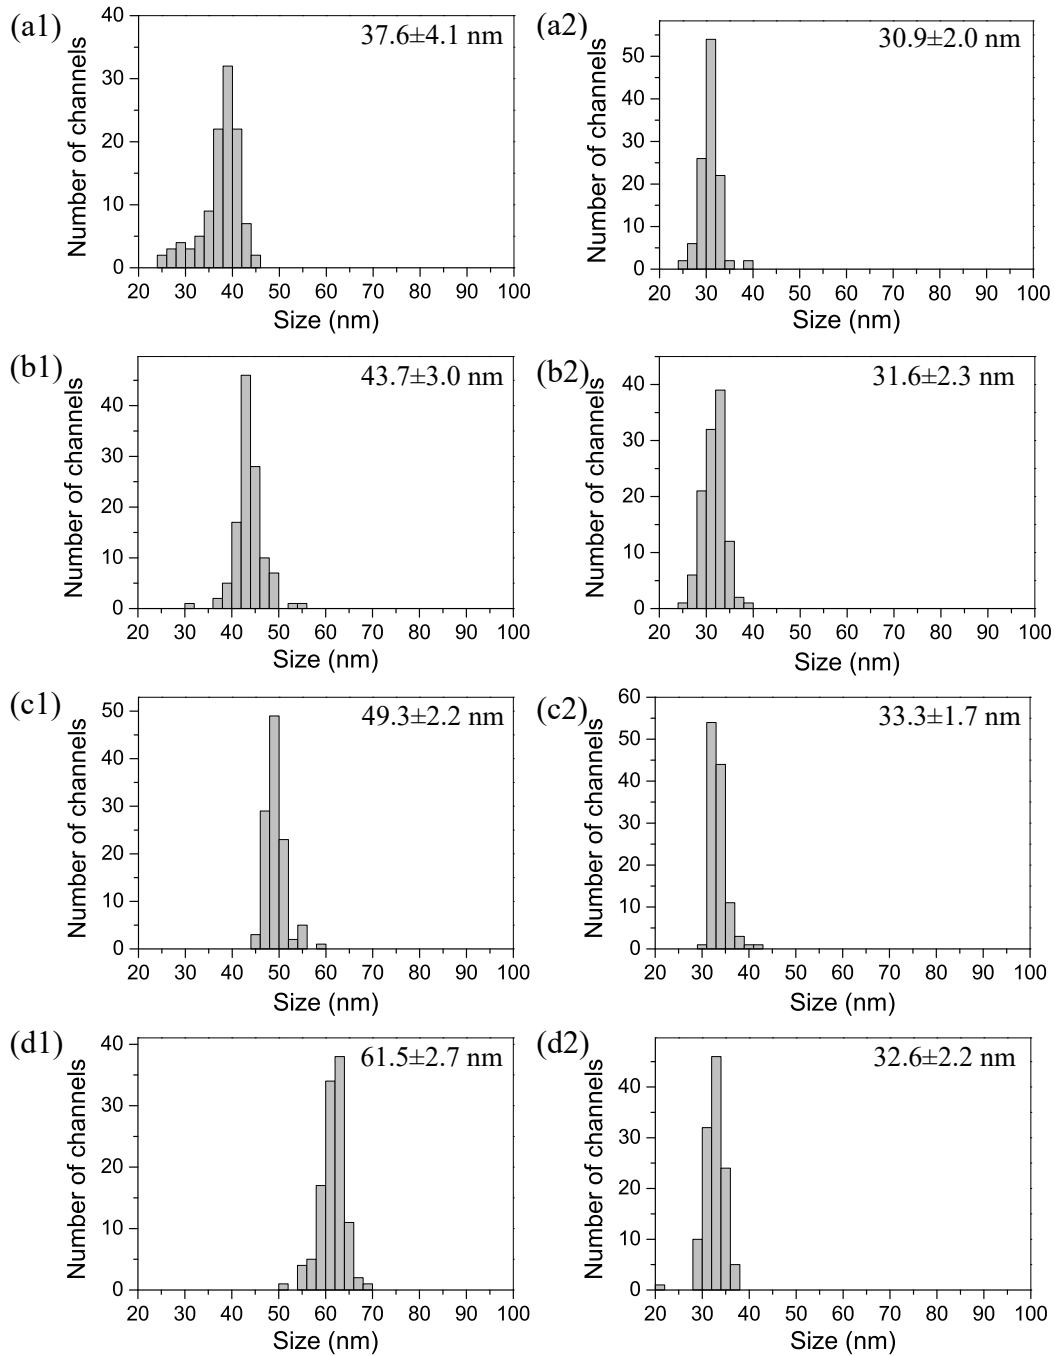

**Fig. S10.** Size distribution histograms of the top and bottom nanochannels in the corresponding through-channel AAO membranes shown in Fig. S9.

**10. Reducing the size difference between the top and the bottom nanochannels in the AAO membranes by an effective etching method based on the temperature gradient regime**

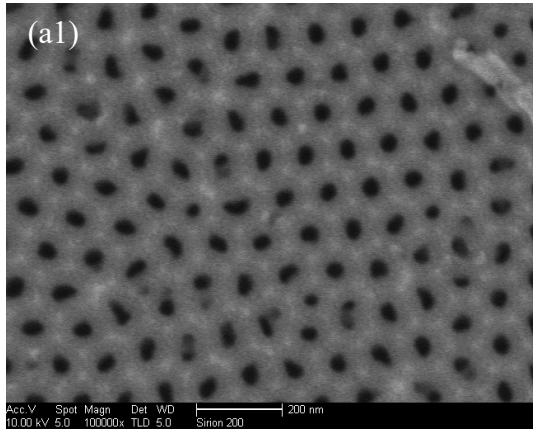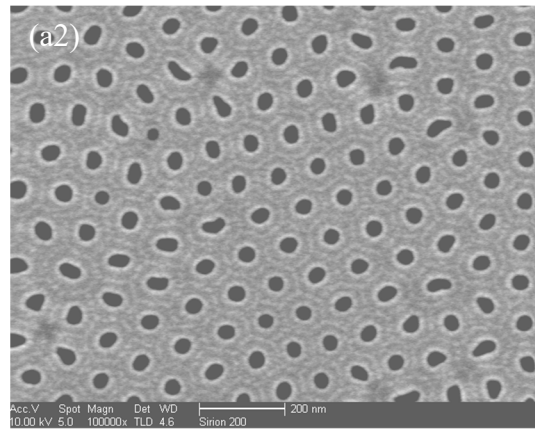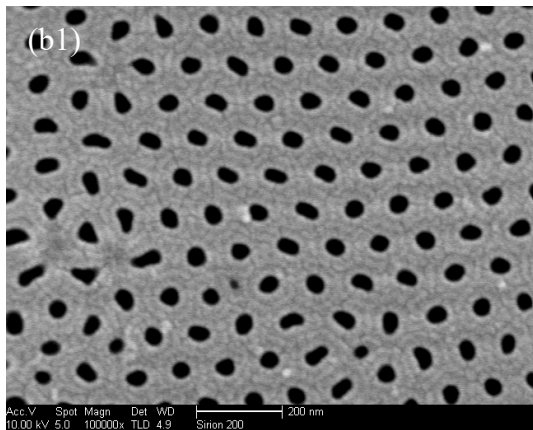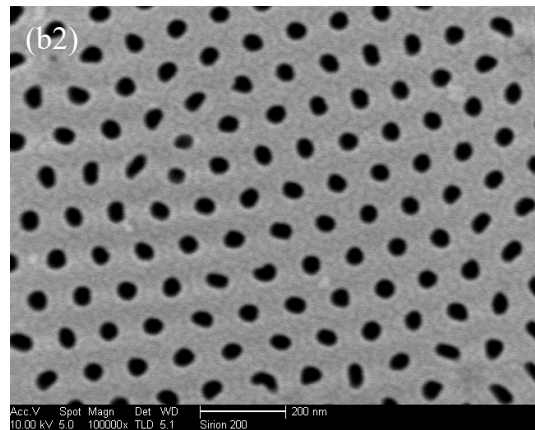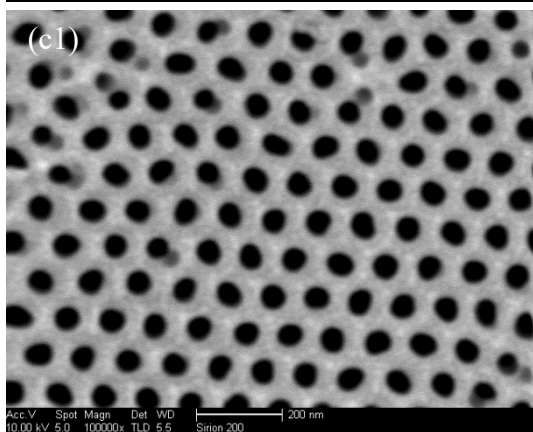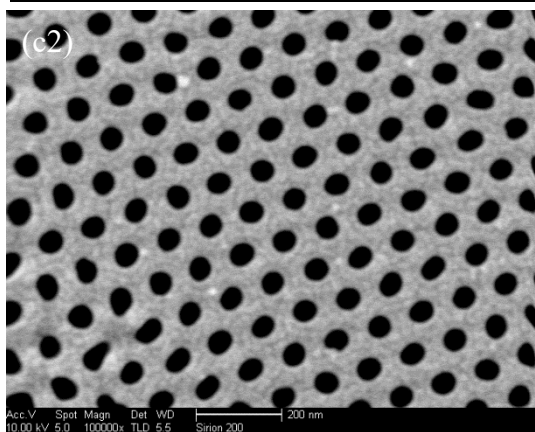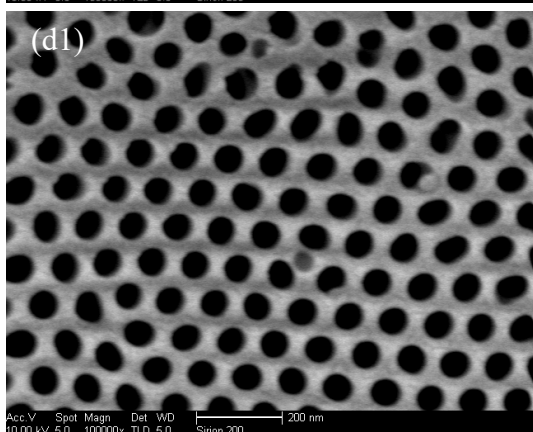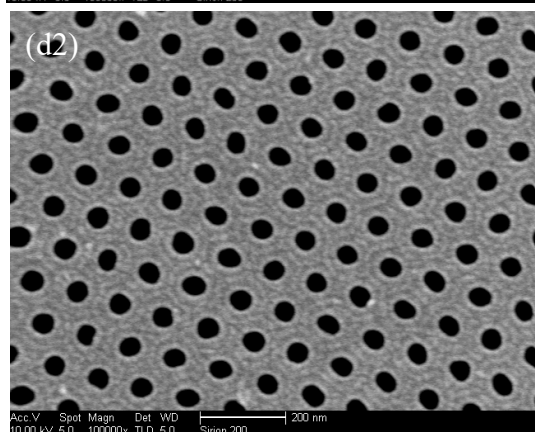

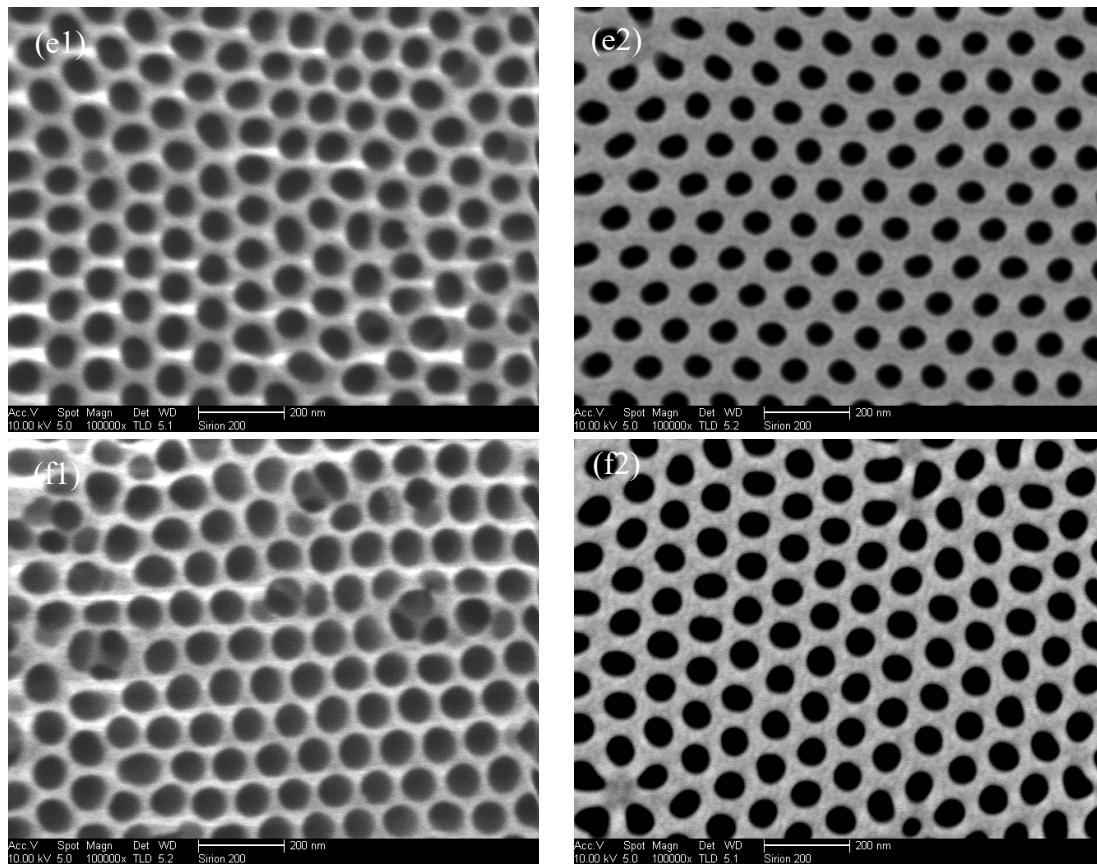

**Fig. S11.** SEM images of the top and the bottom surfaces of the AAO membranes by the etching method based on the temperature gradient regime. (a1), (a2) Top and bottom surfaces of the 27  $\mu\text{m}$  thick membrane after the etching for 2 min, respectively. (b1), (b2) Top and bottom surfaces of the 60  $\mu\text{m}$  thick membrane after the etching for 5 min, respectively. (c1), (c2) Top and bottom surfaces of the 70  $\mu\text{m}$  thick membrane after the etching for 10 min, respectively. (d1)-(f1) Top surfaces of the 93  $\mu\text{m}$  thick membranes after the etching for 10, 25, and 40 min, respectively, (d2)-(f2) Corresponding the bottom surfaces of the 93  $\mu\text{m}$  thick membranes after the etching for 10, 25, and 40 min, respectively.

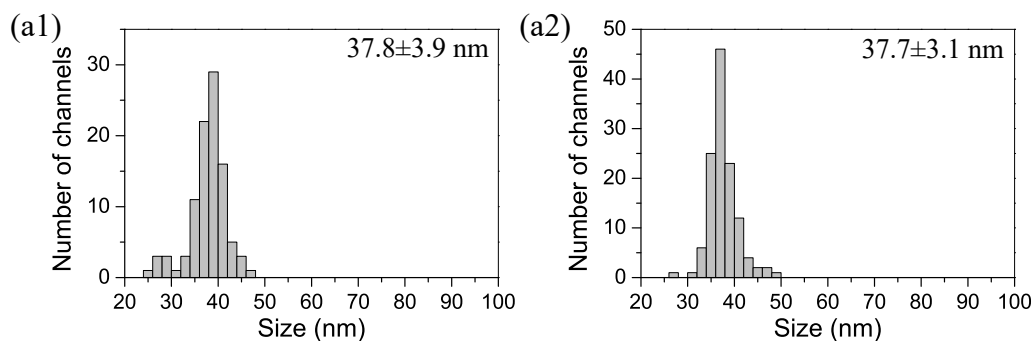

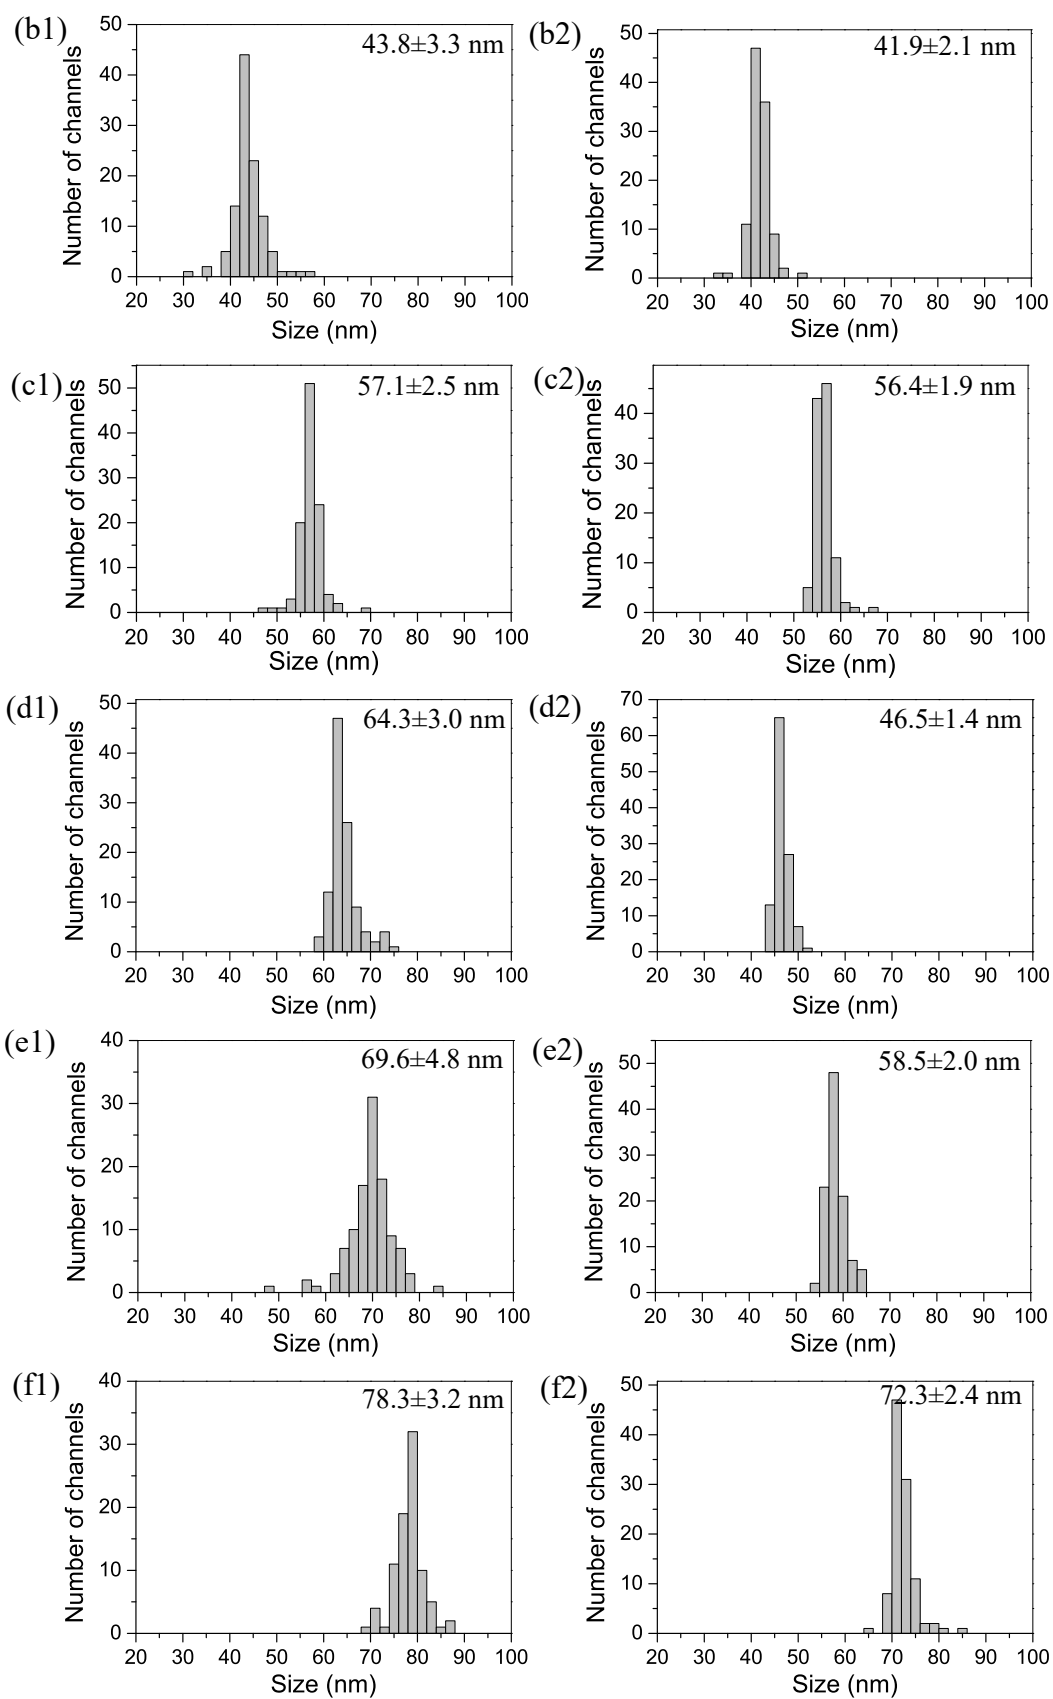

**Fig. S12.** Size distribution histograms of the top and the bottom nanochannels in the AAO membranes shown in Fig. S11.

## **11. Comparisons of the voltage compensation method, and constant anodization voltage and subsequent temperature gradient etching method to fabricate the AAO membranes**

Consider the nanochannel size is linearly proportional to the anodization voltage during the anodization, Shang et al. proposed a voltage compensation method to fabricate the AAO membranes with uniform diameter of nanochannels (G. L. Shang et al. *Mater. Lett.* **110**, 156-159 (2013)). Note that the voltage compensation method presents the essentially different aspects when comparing our constant anodization voltage and subsequent temperature gradient etching method:

### **(a). Growth regimes of nanochannels in AAO membranes are entirely different**

The growth regimes of the nanochannels in AAO membranes strongly depend on the anodization voltage. Furthermore, pore spacing, pore size and wall thickness are linearly proportional to the voltage during both mild anodization (MA) and hard anodization (HA) (W. Lee et al. *Nat. Mater.* **5**, 741-747 (2006)). In typical MA processes, self-ordered arrays of alumina nanopores can be obtained within three self-ordering growth regimes: (1) sulphuric acid at 25V for an interpore distance ( $D_{\text{int}}$ )=63 nm, (2) oxalic acid at 40V for  $D_{\text{int}}$ =100 nm (W. Lee et al. *Nat. Mater.* **5**, 741-747 (2006)), and (3) phosphoric acid at 195V for  $D_{\text{int}}$ =500 nm, indicating the self-ordering growth regime represents the constant voltages during the anodization.

In our work, all of the AAO membranes were fabricated under the self-ordering regime: oxalic acid ( $\text{H}_2\text{C}_2\text{O}_4$ ) at 40 V. The subsequent etching of the self-ordered AAO membranes only tune the nanochannel size but do not change their spacing and the ordered arrangement. That is, our AAO membranes fabricated under self-ordering regime and subsequent etching method are self-ordered nanochannel arrays.

In contrast, for the voltage compensation mode, the voltage was gradually increased from 40 to 52 V during the anodization. Obviously, the growth method has deviated from the self-ordering growth regime. As a result, the formed AAO membranes are not self-ordered nanochannel arrays (the detail will be given in (b)).

### **(b). Structures of the nanochannels in the AAO membranes fabricated by Shang's method and our method are extremely different due to the two completely different growth regimes**

Firstly, in terms of the voltage compensation method

From the cross section SEM image (Fig. S13 from Shang's paper), it is found that the spacing between the nanochannels in the AAO membrane fabricated by the voltage compensation method, obviously increases along the long axis of the nanochannels from about 102 nm on the upper layer marked with U, to about 120 nm on the middle layer marked with M, and then to about 134 nm on the under layer marked with L, this is because the nanochannel spacing in the AAO membranes formed under ordinary MA conditions is linearly dependent on the voltage with a proportionality constant of  $2.5 \text{ nmV}^{-1}$  (W. Lee et al. *Nat. Mater.* **5**, 741-747 (2006), *Nat. Nanotechnol.* **3**, 234-239 (2008).) One can clearly observe that the spacing displays remarkable increase from up to down. Additionally, the nanochannel density decreases from up to down along the



long axis. Since the nanochannel spacing continuously changes during the growth of the nanochannels from up to down with raising the anodization voltage gradually, the growth orientation is not coaxial, which results in a winding (not upright) growth of the nanochannels, especially the nanochannel structures between the bottom and top sections are extremely different shown in the following surface SEM images, therefore, the nanochannel configuration is not cylindrical. That is, the cylindrical nanochannels cannot be fabricated by Shang's method.

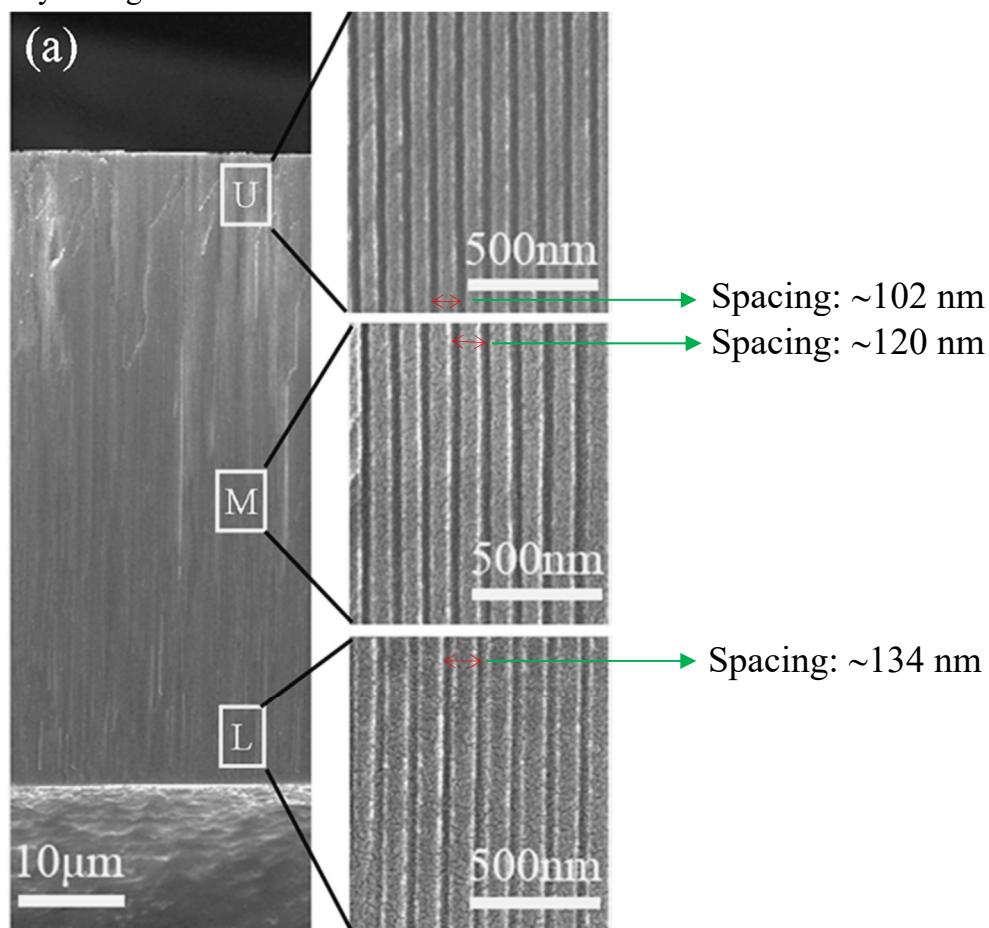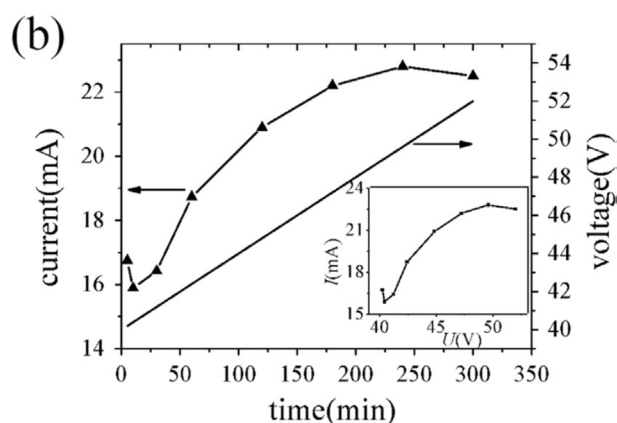

**Fig. S13.** (a) SEM images of sample with the compensation voltage increased from 40 to 52 V. (b) Current-time curve and applied voltage. Reproduced from G. L. Shang et al. *Mater. Lett.* **110**, 156-159 (2013).

On the other hand, although SEM images of the surfaces of AAO membranes fabricated under the voltage compensation mode were not given in the Shang's paper, we have supplemented the experimental data based on the voltage compensation method. Figs. S13(a1) and S13(a2) correspond to SEM images of the top and bottom surfaces of AAO membranes when the anodization voltage increases from 40 V to 52 V with a scan rate of 40 mV/min during the second anodization, it is clearly observed that the nanochannels on the top section (corresponding to the starting voltage of 40 V) basically keep the ordered arrangement, however, the ordered arrangement of the nanochannels on the bottom section (corresponding to the ending voltage of 52 V) has been damaged substantially (Fig. S14(a2)), especially, the majority of pores grown on the bottom surface are not regular as compared with those formed on the top surfaces, which further confirms that the whole nanochannels are not cylindrical. The supplemented experiments unambiguously testify that the uniform nanochannel diameter cannot be obtained by the voltage compensation method owing to breaking the self-ordering growth regime with the irregular shape of the nanochannels. Furthermore, to study the effect of voltage on the nanochannel structures, we have fabricated the AAO membranes by the voltage compensation from 40 V to 60 V. It is found the self-ordered arrangement of the nanochannels on the bottom surface has been damaged completely (Fig. S14(b2)), also most of the pores on the bottom surface present irregular shape.

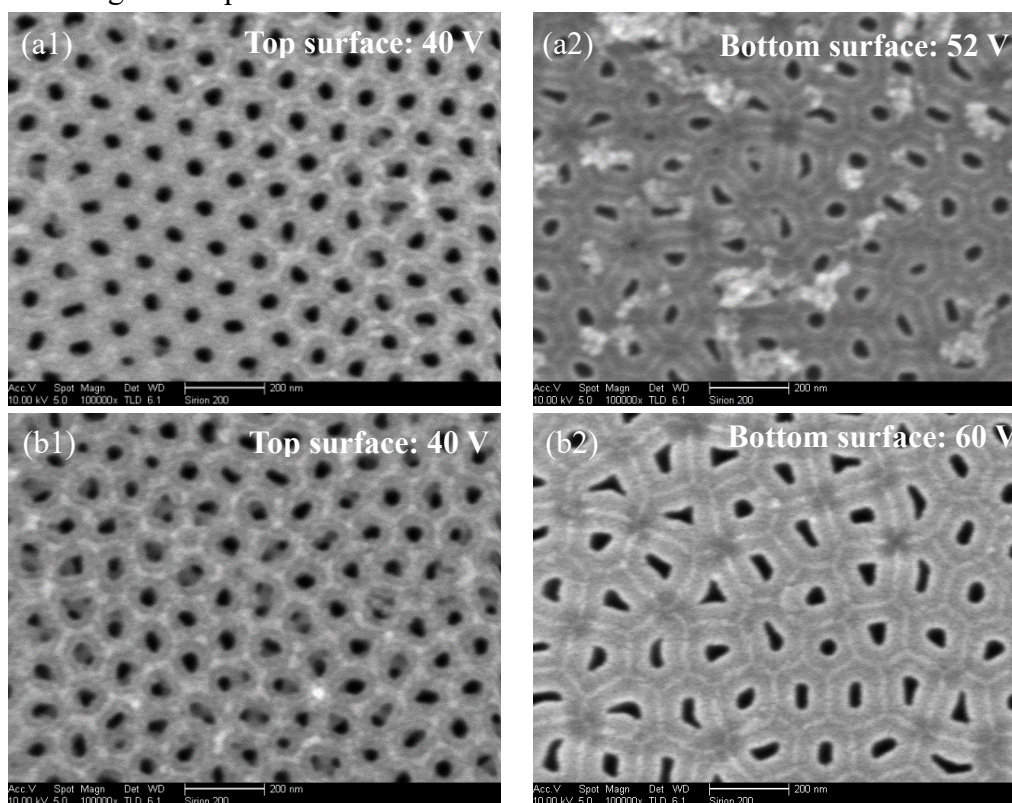

**Fig. S14.** SEM images of the AAO membranes fabricated by the voltage compensation method. (a1), (a2) Top and bottom surfaces for the voltage changing from 40 V to 52 V; (b1), (b2) Top and bottom surfaces for the voltage changing from 40 V to 60 V.

Secondly, in terms of our work, the AAO membranes were fabricated by the self-ordering regime with the constant voltage of 40 V.

Statistic measurements of 300 nanochannel spacings on the top and bottom surfaces in the AAO membrane formed by the self-ordering growth (Fig. S4), illustrate the average spacing is constant (102.5 nm). Figs. S15(a1) and S15(a2) display SEM images of the top and bottom surfaces of the as-prepared self-ordered AAO membrane (reproduced from Fig. S10). While Figs. S15(b1) and S15(b2) illustrate SEM images of the top and bottom surfaces of the same AAO membrane after the temperature gradient etching (reproduced from Fig. S10). It is observed the nanochannel size on the bottom surface (Fig. S15(a2)) is much smaller than that on the top surface (Fig. S15(a1)), but the spacing between adjacent nanochannels on the bottom surface is the same as that on the top surface, indicating the growth orientation of the nanochannels is coaxial with upright nanochannels. After the temperature gradient etching, the nanochannel size on the bottom surface (Fig. S15(b2)) is equals to that on the top surface (Fig. S15(b1)), also the nanochannel spacings on both the bottom and top surfaces are constant after the etching. So, the cylindrical nanochannels can be achieved by the temperature gradient etching of the truncated conical nanochannels. also, the nanochannels fabricated by the self-ordering growth regime and subsequent temperature gradient etching, exhibit hexagonally self-ordered arrangement with regular nanochannels.

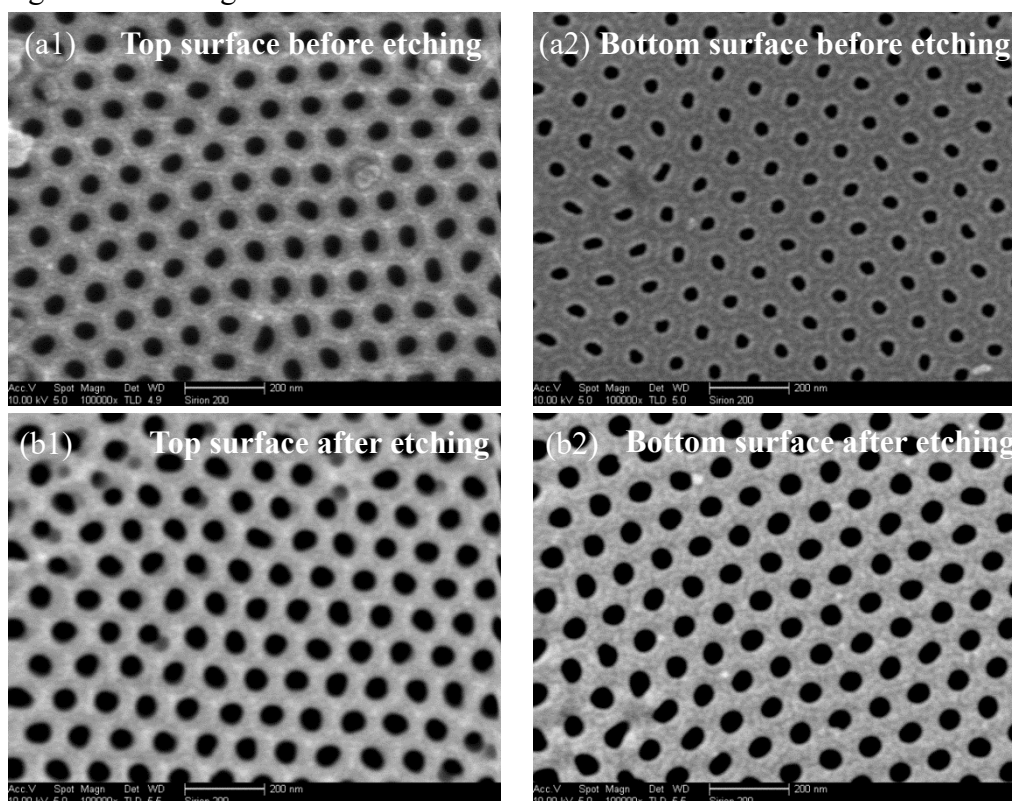

**Fig. S15.** SEM images of the AAO membrane fabricated by the self-ordering growth at the constant voltage of 40 V. (a1), (a2) Top and bottom surfaces of the as-prepared AAO membrane; (b1), (b2) Top and bottom surfaces via the temperature gradient etching.

The following table lists the comparisons of the nanochannels: one is the self-ordered AAO membranes fabricated by our constant anodization voltage method (self-ordering growth regime) and the subsequent temperature gradient etching, the other is the AAO membranes fabricated by the voltage compensation mode (non self-ordering growth regime) reported by Shang et al.

| <b>Comparison of parameters</b>       | <b>Self-ordering growth regime</b>                                                                                                                                                                                  | <b>Non self-ordering growth regime</b>                                                                                |
|---------------------------------------|---------------------------------------------------------------------------------------------------------------------------------------------------------------------------------------------------------------------|-----------------------------------------------------------------------------------------------------------------------|
| Anodization voltage                   | Constant (40 V)                                                                                                                                                                                                     | Variable (increasing from 40 V to 52 V)                                                                               |
| Spacing of nanochannels ( $D_{int}$ ) | <b>Constant</b> (102.5 nm)                                                                                                                                                                                          | <b>Variable</b> (from 102 nm to 134 nm)                                                                               |
| Arrangement of nanochannels           | <b>Self-ordered</b> nanochannel arrays                                                                                                                                                                              | <b>Disordered</b> nanochannel arrays (on the bottom surface)                                                          |
| Growth orientation of nanochannels    | <b>Coaxial</b> growth                                                                                                                                                                                               | <b>Non-coaxial</b> growth                                                                                             |
| Configurations of nanochannels        | <b>High regular</b> shape (upright nanochannels)<br><br>Truncated conical nanochannels in as-prepared AAO membranes<br><br><b>Cylindrical</b> nanochannels via the etching based on the temperature gradient regime | <b>Irregular</b> shape (winding nanochannels)<br><br><b>Non-cylindrical</b> nanochannels under the non-coaxial growth |
| Density of nanochannels               | <b>Constant</b> ( $1.1 \times 10^{10} cm^{-2}$ )<br><br>$\left(\frac{2}{\sqrt{3}D_{int}^2} \times 10^{14} cm^{-2}\right)$                                                                                           | <b>Variable</b> (cannot be calculated statistically due to the disordered arrangement of nanochannels)                |
| References                            | Our work                                                                                                                                                                                                            | Publication in Materials Letters 110 (2013) 156-159                                                                   |
